# Supplementary material for: Utility of redox-active ligands for reversible multi-electron transfer in uranyl(vi) complexes
Source: Royal Society of Chemistry journal article supplement (doi:10.1039/d3qi00189j), 2023-01-01
Supplement: d3qi00189j1.pdf [file d3qi00189j1.pdf]

## Electronic Supplementary Information (ESI)

### Utility of redox-active ligands for reversible multi-electron transfer in uranyl(VI) complexes

Tomoyuki Takeyama,<sup>\*a</sup> Satoru Tsushima,<sup>b,c</sup> Koichiro Takao<sup>\*,a</sup>

#### AUTHOR ADDRESS

<sup>a</sup> Laboratory for Zero-Carbon Energy, Institute of Innovative Research, Tokyo Institute of Technology 2-12-1 N1-32, O-okayama, Meguro-ku, 152-8550 Tokyo, Japan

<sup>b</sup> Institute of Resource Ecology, Helmholtz-Zentrum Dresden-Rossendorf (HZDR), Bautzner Landstraße 400, 01328 Dresden, Germany

<sup>c</sup> International Research Frontiers Initiative (IRFI), Institute of Innovative Research, Tokyo Institute of Technology, 2-12-1, O-okayama, Meguro-ku, 152-8550 Tokyo, Japan

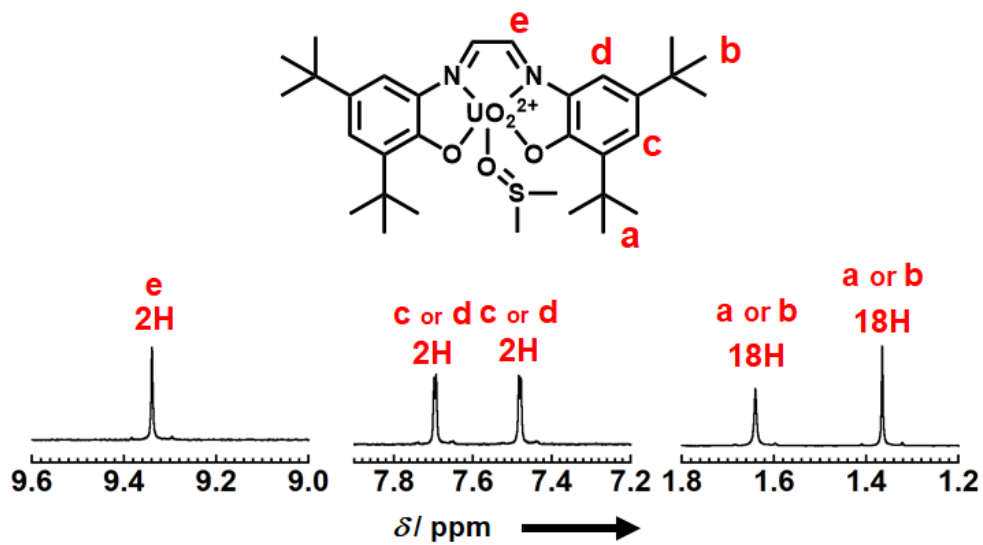

Figure S1.  $^1H$  NMR spectra of  $[U^{VI}O_2(L1)DMSO]$  in  $DMSO-d_6$ .

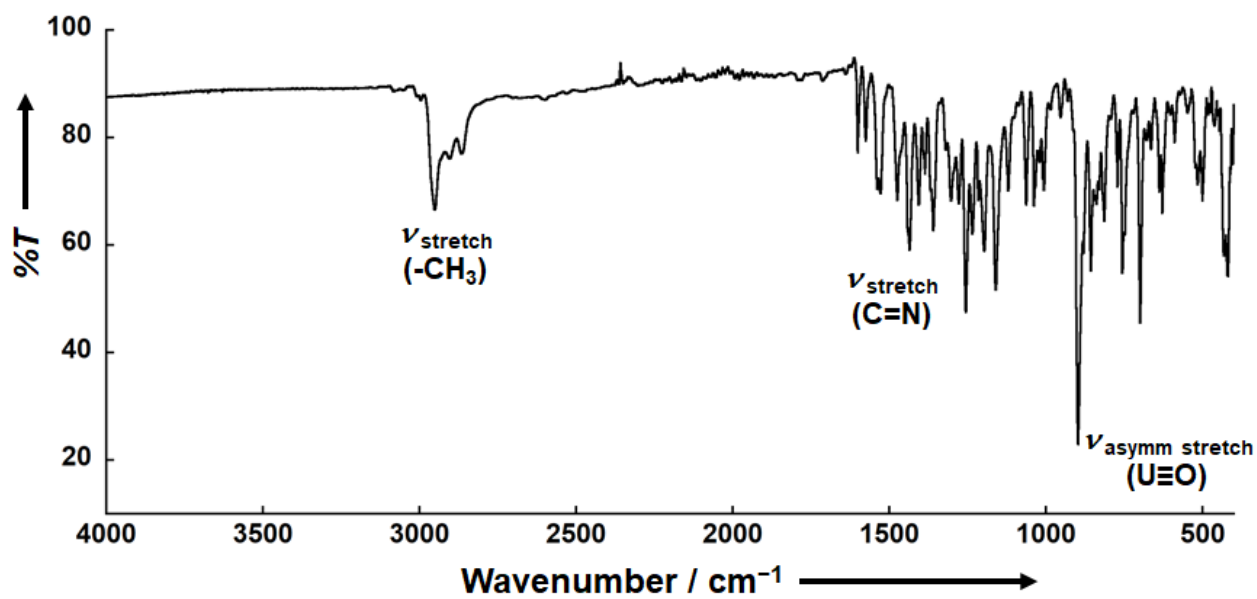

Figure S2. IR spectra of  $[U^{VI}O_2(L1)DMSO]$ .

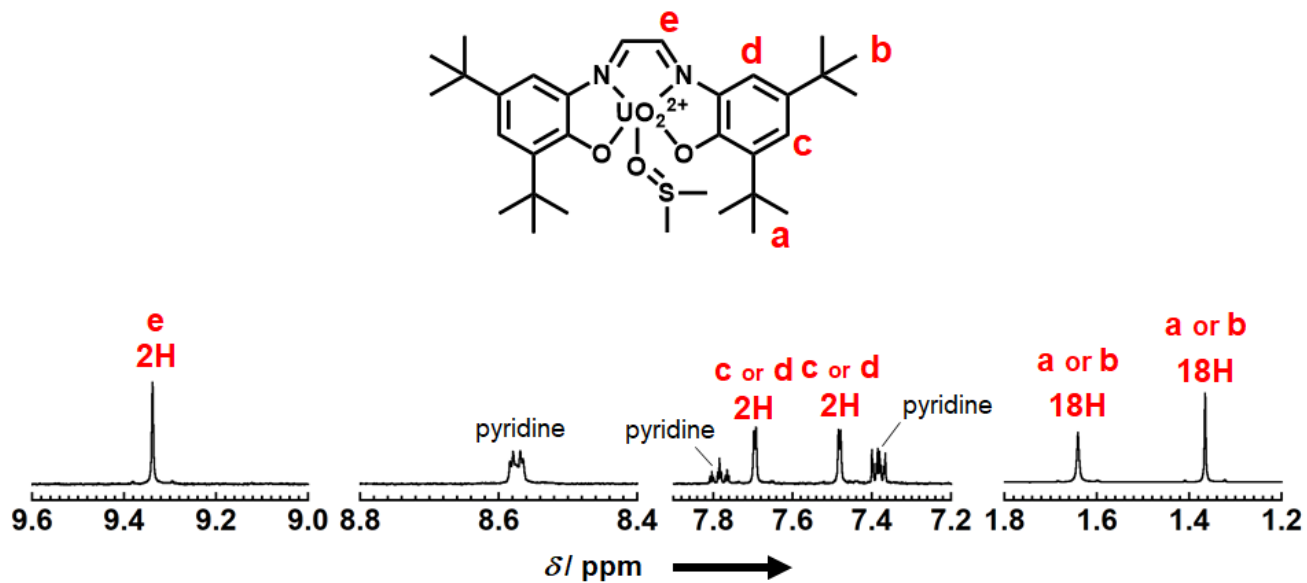

**Figure S3.**  $^1H$  NMR spectra of the  $DMSO-d_6$  solution dissolving  $[U^{VI}O_2(L1)C_5H_5N]$ .

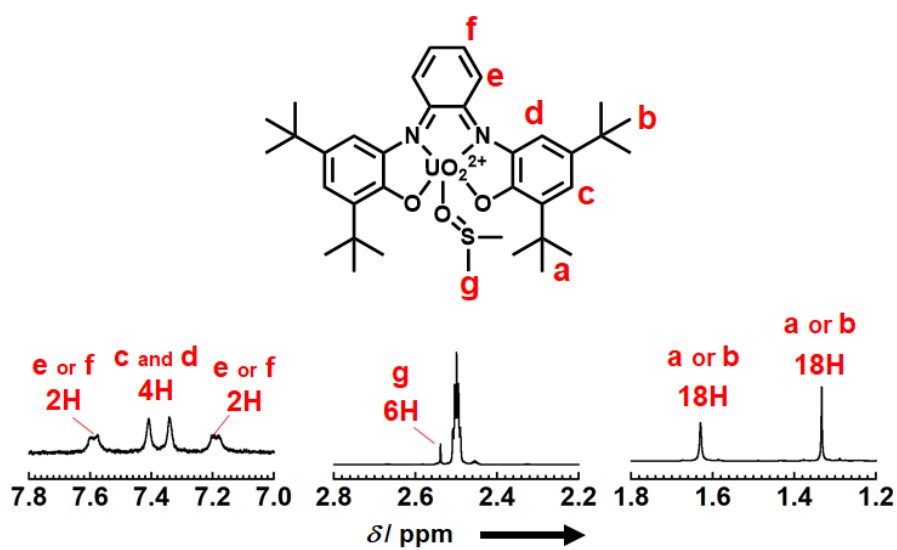

**Figure S4.**  $^1H$  NMR spectra of  $[U^{VI}O_2(L2)DMSO]$  in  $DMSO-d_6$ .

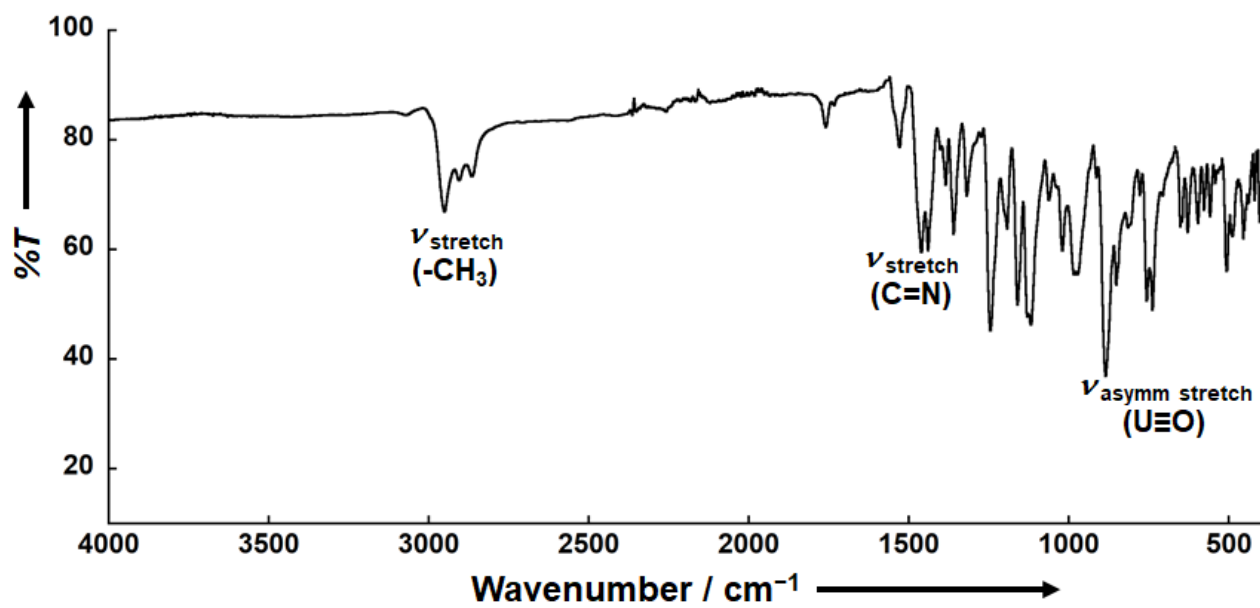

**Figure S5.** IR spectra of  $[U^{VI}O_2(L2)DMSO]$ .

### Crystal structure of $[U^{VI}O_2(L2)DMSO] \cdot (DMSO)_{0.5}$

The crystal structure analysis of  $[U^{VI}O_2(L2)DMSO] \cdot (DMSO)_{0.5}$  was performed. The obtained molecular structures of  $[U^{VI}O_2(L2)DMSO]$  are shown in Figure S6. And crystallographic data is listed below.

Crystallographic data for  $[U^{VI}O_2(L2)DMSO] \cdot (DMSO)_{0.5}$ :  $F_w = 899.93$ ,  $0.15 \times 0.05 \times 0.02$  mm<sup>3</sup>, orthorhombic,  $P21212$ ,  $a = 28.7510(8)$  Å,  $b = 31.6909(9)$  Å,  $c = 9.4393(2)$  Å,  $V = 8600.6(4)$  Å<sup>3</sup>,  $Z = 8$ ,  $T = 93$  K,  $D_{\text{calcd}} = 1.390$  g/cm<sup>3</sup>,  $\mu(\text{Mo } K\alpha) = 3.886$  mm<sup>-1</sup>,  $GOF = 1.016$ ,  $R_1(I > 2\sigma) = 0.0786$ ,  $wR_2(\text{all}) = 0.1812$ .

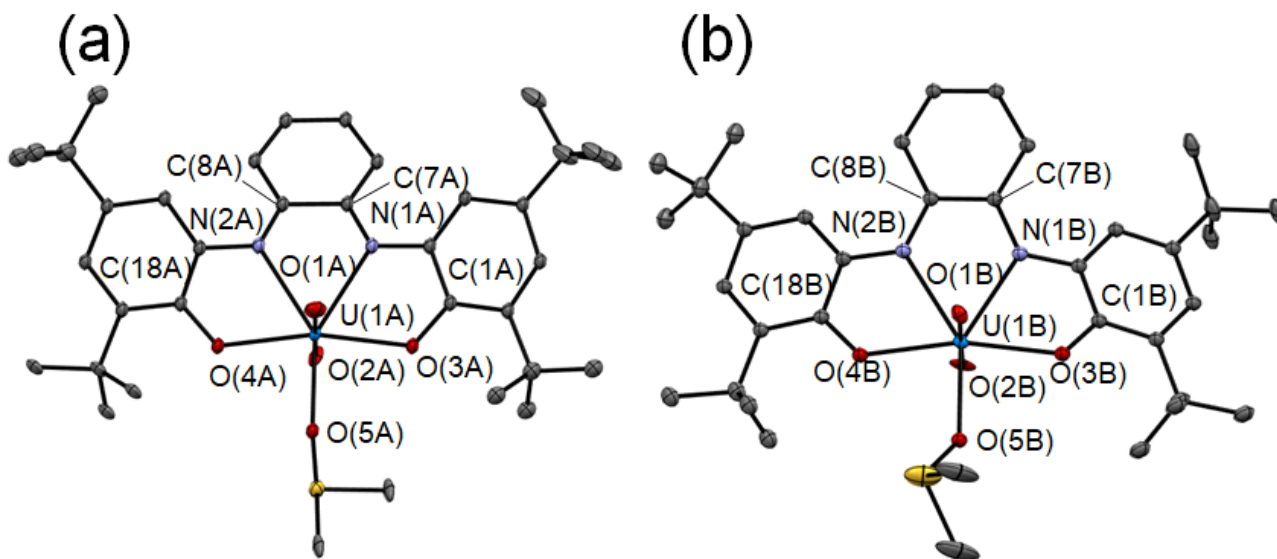

**Figure S6.** ORTEP views of  $[U^{VI}O_2(L2)DMSO]$ . Ellipsoids are at 50% probability. Hydrogen atoms and solvent molecules were omitted by clarify. Disordered atoms are also represented.

The molecular structures of  $[U^{VI}O_2(L2)DMSO]$  are clearly determined, however, high quality of diffraction data was not obtained, because single crystals of  $[U^{VI}O_2(L2)DMSO] \cdot (DMSO)_{0.5}$  are poorly diffracting needle-like crystals. In spite of many trials for recrystallization and SCXRD experiments, many Alert level A and B are remained by check CIF report of International Union of Crystallography, as described below.

PLAT971\_ALERT\_2\_A Check Calcd Resid. Dens. 1.53Ang From C9B 5.20 eA-3

PLAT971\_ALERT\_2\_A Check Calcd Resid. Dens. 1.42Ang From C9A 3.95 eA-3

PLAT342\_ALERT\_3\_B Low Bond Precision on C-C Bonds.....0.02185 Ang.

PLAT971\_ALERT\_2\_B Check Calcd Resid. Dens. 0.83Ang From C17B 3.15 eA-3

PLAT971\_ALERT\_2\_B Check Calcd Resid. Dens. 1.71Ang From C34A 2.84 eA-3

PLAT971\_ALERT\_2\_B Check Calcd Resid. Dens. 1.52Ang From C2A 2.71 eA-3

PLAT971\_ALERT\_2\_B Check Calcd Resid. Dens. 1.60Ang From C22B 2.57 eA-3

PLAT972\_ALERT\_2\_B Check Calcd Resid. Dens. 1.48Ang From S2 -2.82 eA-3

PLAT972\_ALERT\_2\_B Check Calcd Resid. Dens. 2.20Ang From C10B -2.76 eA-3

PLAT972\_ALERT\_2\_B Check Calcd Resid. Dens. 0.89Ang From U1A -2.51 eA-3

**Table S1.** Selected bond lengths (Å) of crystal structures of  $[\text{U}^{\text{VI}}\text{O}_2(\text{L}2)\text{DMSO}]\cdot(\text{DMSO})_{0.5}$ .

| $[\text{U}^{\text{VI}}\text{O}_2(\text{L}2)\text{DMSO}]\cdot(\text{DMSO})_{0.5}$ |          |
|----------------------------------------------------------------------------------|----------|
| U(1)–O(1)                                                                        | 1.77(1)  |
|                                                                                  | 1.78(1)  |
| U(1)–O(2)                                                                        | 1.79(1)  |
|                                                                                  | 1.79(1)  |
| U(1)–O(3)                                                                        | 2.273(9) |
|                                                                                  | 2.29(1)  |
| U(1)–O(4)                                                                        | 2.277(9) |
|                                                                                  | 2.30(1)  |
| U(1)–N(1)                                                                        | 2.50(1)  |
|                                                                                  | 2.52(1)  |
| U(1)–N(2)                                                                        | 2.52(1)  |
|                                                                                  | 2.51(1)  |
| U(1)–O(5)                                                                        | 2.34(1)  |
|                                                                                  | 2.35(1)  |
| C(7)–N(1)                                                                        | 1.34(2)  |
|                                                                                  | 1.34(2)  |
| C(8)–N(2)                                                                        | 1.31(2)  |
|                                                                                  | 1.35(2)  |
| C(1)–O(3)                                                                        | 1.33(2)  |
|                                                                                  | 1.33(2)  |
| C(18)–O(4)                                                                       | 1.31(2)  |
|                                                                                  | 1.34(1)  |

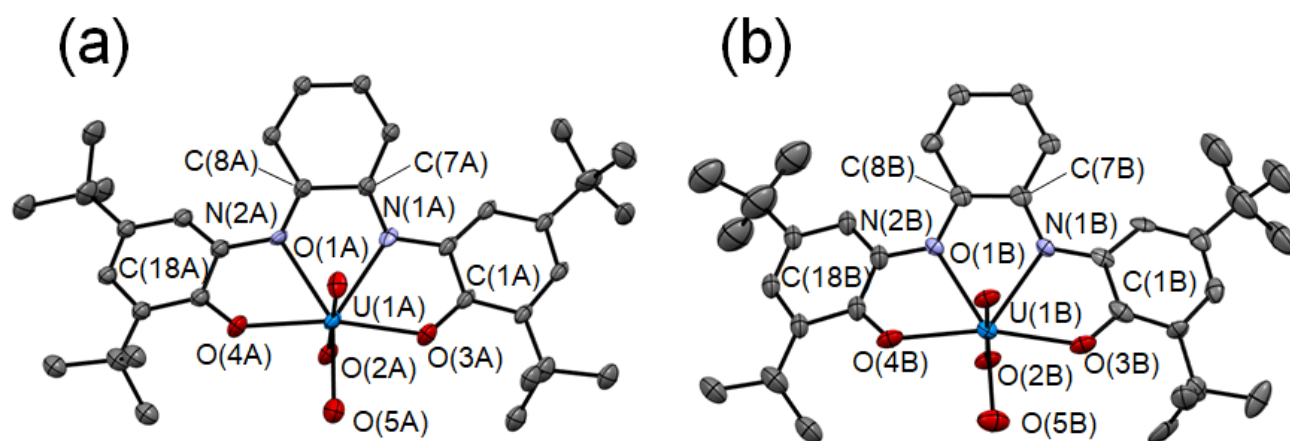

**Figure S7.** ORTEP views of  $[U^{VI}O_2(L2)H_2O]$ . Ellipsoids are at 50% probability. Hydrogen atoms and solvent molecules were omitted for clarity. Disordered atoms are also represented.



**Table S2.** Selected bond angles (°) in [U<sup>VI</sup>O<sub>2</sub>(L1)C<sub>5</sub>H<sub>5</sub>N], [U<sup>VI</sup>O<sub>2</sub>(L2)H<sub>2</sub>O] and [U<sup>VI</sup>O<sub>2</sub>(L3)].

| [U <sup>VI</sup> O <sub>2</sub> (L1)C <sub>5</sub> H <sub>5</sub> N] |         | [U <sup>VI</sup> O <sub>2</sub> (L2)H <sub>2</sub> O] |                  | [U <sup>VI</sup> O <sub>2</sub> (L3)] |          |
|----------------------------------------------------------------------|---------|-------------------------------------------------------|------------------|---------------------------------------|----------|
| ∠O(3)–U(1)–N(1)                                                      | 65.5(3) | ∠O(3)–U(1)–N(1)                                       | 65.4(3), 65.7(3) | ∠O(3)–U(1)–N(1)                       | 65.4(1)  |
| ∠N(1)–U(1)–N(2)                                                      | 62.6(3) | ∠N(1)–U(1)–N(2)                                       | 61.6(3), 62.9(3) | ∠N(1)–U(1)–N(2)                       | 63.2(1)  |
| ∠O(4)–U(1)–N(2)                                                      | 64.8(3) | ∠O(4)–U(1)–N(2)                                       | 65.5(3), 64.8(3) | ∠N(2)–U(1)–N(3)                       | 62.9(1)  |
| ∠O(3)–U(1)–N(3)                                                      | 86.9(3) | ∠O(3)–U(1)–O(5)                                       | 83.1(3), 77.9(3) | ∠N(3)–U(1)–O(4)                       | 65.0(1)  |
| ∠O(4)–U(1)–N(3)                                                      | 80.3(3) | ∠O(4)–U(1)–O(5)                                       | 84.9(3), 89.1(3) | ∠O(3)–U(1)–O(4)                       | 103.6(2) |
| ∠O(1)–U(1)–O(3)                                                      | 90.6(3) | ∠O(1)–U(1)–O(3)                                       | 92.2(3), 91.9(3) | ∠O(1)–U(1)–O(3)                       | 91.1(2)  |
| ∠O(1)–U(1)–N(1)                                                      | 87.4(3) | ∠O(1)–U(1)–N(1)                                       | 84.2(3), 88.4(3) | ∠O(1)–U(1)–N(1)                       | 85.9(2)  |
| ∠O(1)–U(1)–N(2)                                                      | 87.0(3) | ∠O(1)–U(1)–N(2)                                       | 89.4(3), 90.4(3) | ∠O(1)–U(1)–N(2)                       | 87.7(2)  |
| ∠O(1)–U(1)–O(4)                                                      | 90.6(3) | ∠O(1)–U(1)–O(4)                                       | 90.2(3), 92.7(3) | ∠O(1)–U(1)–N(3)                       | 90.1(2)  |
| ∠O(1)–U(1)–N(3)                                                      | 86.7(3) | ∠O(1)–U(1)–O(5)                                       | 88.6(3), 86.2(3) | ∠O(1)–U(1)–O(4)                       | 90.7(2)  |

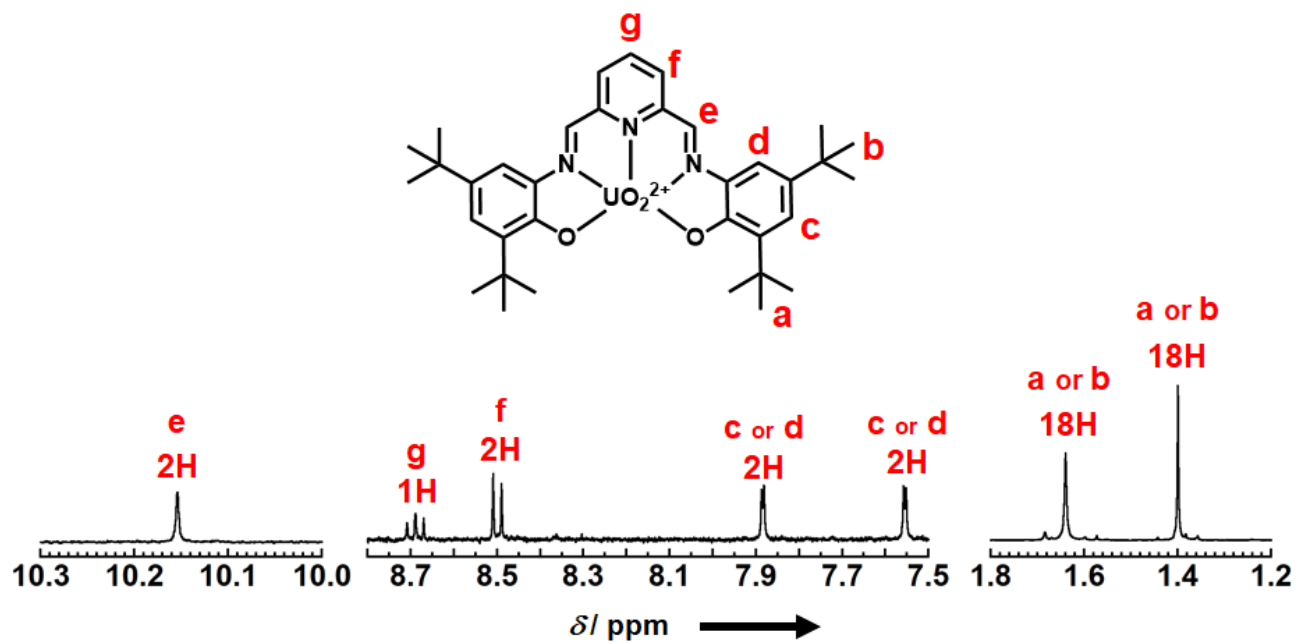

Figure S8.  $^1\text{H}$  NMR spectra of  $[\text{U}^{\text{VI}}\text{O}_2(\text{L3})]$  in  $\text{DMSO-}d_6$ .

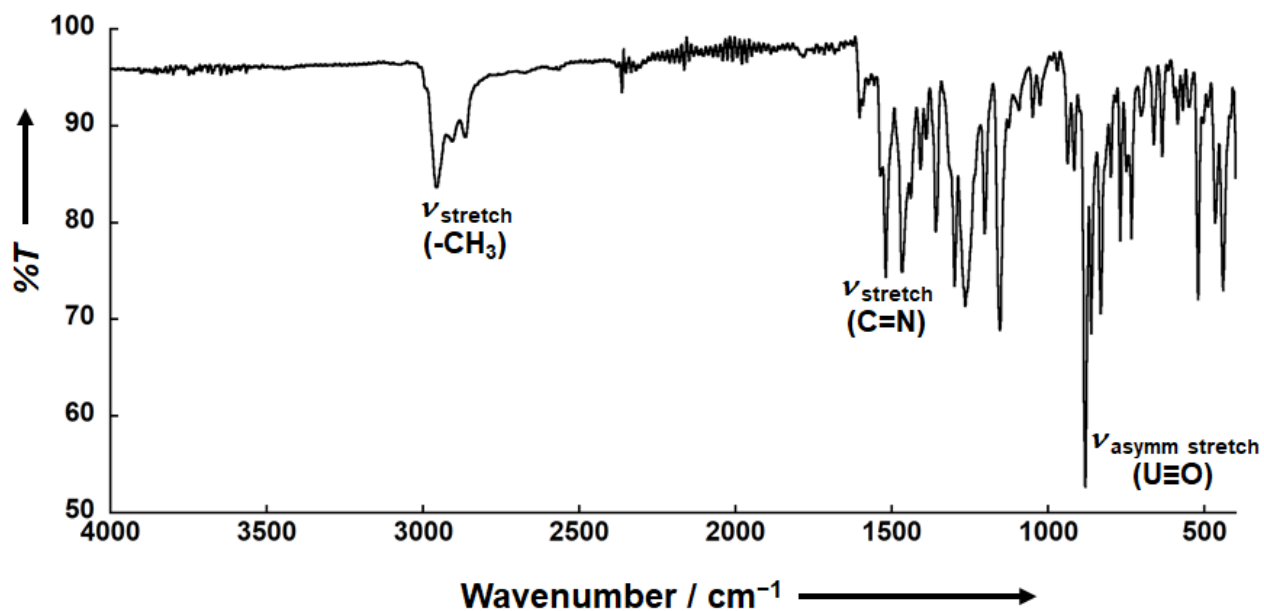

Figure S9. IR spectra of  $[\text{U}^{\text{VI}}\text{O}_2(\text{L3})]$ .

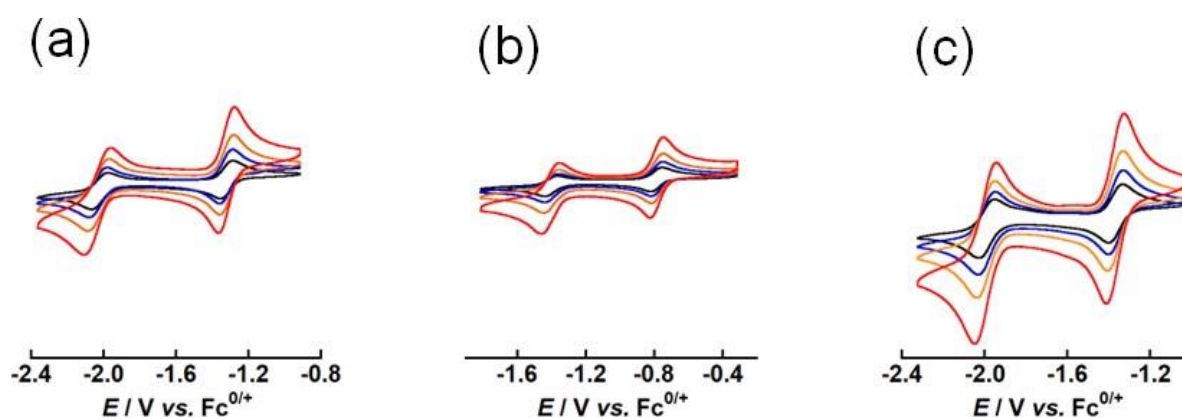

**Figure S10.** Cyclic voltammograms (CV) for [U<sup>VI</sup>O<sub>2</sub>(L<sub>x</sub>)DMSO<sub>y</sub>] ( $x = 1-3$ ,  $y = 0-1$ ). in DMSO at 295 K. [U<sup>VI</sup>O<sub>2</sub>(L1)DMSO] (a), [U<sup>VI</sup>O<sub>2</sub>(L2)DMSO] (b), and [U<sup>VI</sup>O<sub>2</sub>(L3)] (c). Concentration of the complex was adjusted to 0.50 mM for [U<sup>VI</sup>O<sub>2</sub>(L1)DMSO] and [U<sup>VI</sup>O<sub>2</sub>(L2)DMSO] and 1.00 mM for [U<sup>VI</sup>O<sub>2</sub>(L3)]. Tetra-*n*-butylammonium perchlorate (0.1 M) was used as a supporting electrolyte. Potentials in the figures show the relative values to that of the Fc<sup>0/+</sup> redox couple. Scan rates are 50 mV·s<sup>-1</sup> (black), 100 mV·s<sup>-1</sup> (blue), 200 mV·s<sup>-1</sup> (orange) and 500 mV·s<sup>-1</sup> (red).

**Table S3.** Electrochemical data of [U<sup>VI</sup>O<sub>2</sub>(L1)DMSO] in DMSO containing 0.1 M *tetra-n*-butylammonium perchlorate at 295 K. Potentials show the relative values to that of the Fc<sup>0/+</sup> redox couple.

| Scan rate              | $E_{pc,1} / V$ | $E_{pa,1} / V$ | $E_{1^{0'}}$ / V | $\Delta E_{p,1} / V$ | $E_{pc,2} / V$ | $E_{pa,2} / V$ | $E_{2^{0'}}$ / V | $\Delta E_{p,2} / V$ |
|------------------------|----------------|----------------|------------------|----------------------|----------------|----------------|------------------|----------------------|
| 50 mV·s <sup>-1</sup>  | -1.35          | -1.29          | -1.32            | 0.06                 | -2.06          | -1.98          | -2.02            | 0.08                 |
| 100 mV·s <sup>-1</sup> | -1.36          | -1.29          | -1.33            | 0.07                 | -2.08          | -1.98          | -2.03            | 0.10                 |
| 200 mV·s <sup>-1</sup> | -1.36          | -1.28          | -1.32            | 0.08                 | -2.09          | -1.97          | -2.03            | 0.12                 |
| 500 mV·s <sup>-1</sup> | -1.37          | -1.28          | -1.33            | 0.09                 | -2.11          | -1.96          | -2.04            | 0.15                 |

**Table S4.** Electrochemical data of [U<sup>VI</sup>O<sub>2</sub>(L2)DMSO] in DMSO containing 0.1 M *tetra-n*-butylammonium perchlorate at 295 K. Potentials show the relative values to that of the Fc<sup>0/+</sup> redox couple.

| Scan rate              | $E_{pc,1} / V$ | $E_{pa,1} / V$ | $E_{1^{0'}}$ / V | $\Delta E_{p,1} / V$ | $E_{pc,2} / V$ | $E_{pa,2} / V$ | $E_{2^{0'}}$ / V | $\Delta E_{p,2} / V$ |
|------------------------|----------------|----------------|------------------|----------------------|----------------|----------------|------------------|----------------------|
| 50 mV·s <sup>-1</sup>  | -0.82          | -0.75          | -0.79            | 0.07                 | -1.44          | -1.36          | -1.40            | 0.08                 |
| 100 mV·s <sup>-1</sup> | -0.82          | -0.75          | -0.79            | 0.07                 | -1.45          | -1.36          | -1.41            | 0.09                 |
| 200 mV·s <sup>-1</sup> | -0.82          | -0.75          | -0.79            | 0.07                 | -1.45          | -1.36          | -1.41            | 0.09                 |
| 500 mV·s <sup>-1</sup> | -0.83          | -0.74          | -0.79            | 0.09                 | -1.46          | -1.35          | -1.41            | 0.11                 |

**Table S5.** Electrochemical data of [U<sup>VI</sup>O<sub>2</sub>(L3)] in DMSO containing 0.1 M *tetra-n*-butylammonium perchlorate at 295 K. Potentials show the relative values to that of the Fc<sup>0/+</sup> redox couple.

| Scan rate              | $E_{pc,1} / V$ | $E_{pa,1} / V$ | $E_{1^{0'}}$ / V | $\Delta E_{p,1} / V$ | $E_{pc,2} / V$ | $E_{pa,2} / V$ | $E_{2^{0'}}$ / V | $\Delta E_{p,2} / V$ |
|------------------------|----------------|----------------|------------------|----------------------|----------------|----------------|------------------|----------------------|
| 50 mV·s <sup>-1</sup>  | -1.40          | -1.33          | -1.37            | 0.07                 | -2.03          | -1.95          | -1.99            | 0.08                 |
| 100 mV·s <sup>-1</sup> | -1.40          | -1.33          | -1.37            | 0.07                 | -2.03          | -1.95          | -1.99            | 0.08                 |
| 200 mV·s <sup>-1</sup> | -1.41          | -1.33          | -1.37            | 0.08                 | -2.03          | -1.95          | -1.99            | 0.08                 |
| 500 mV·s <sup>-1</sup> | -1.41          | -1.33          | -1.37            | 0.08                 | -2.03          | -1.95          | -1.99            | 0.08                 |

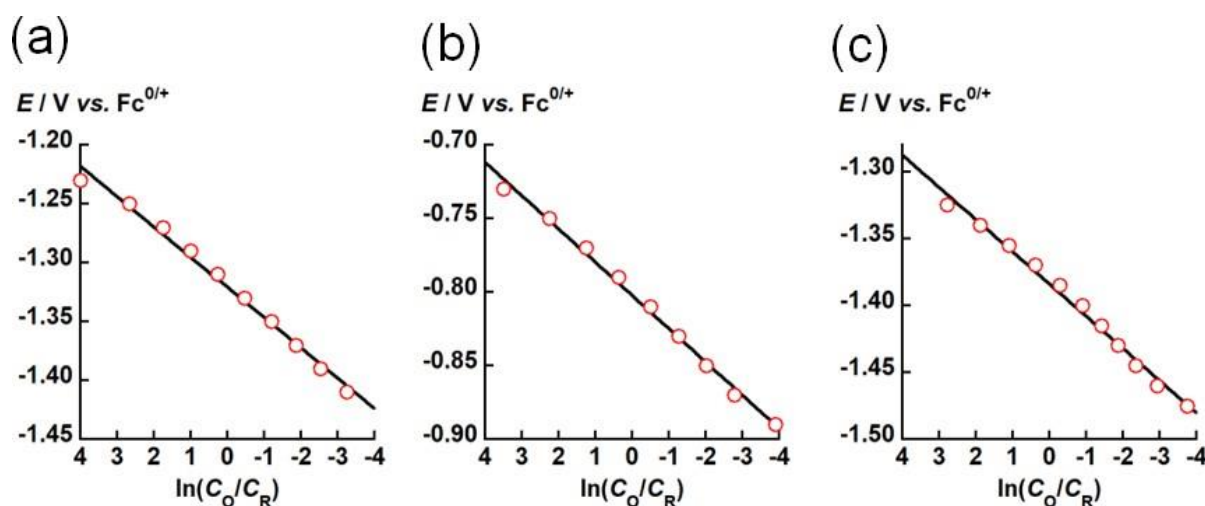

**Figure S11.** Nernstian plot for the spectral change of the electrochemical reduction of  $[\text{U}^{\text{VI}}\text{O}_2(\text{Lx})\text{DMSO}_y]$  ( $x = 1-3$ ,  $y = 0-1$ ).  $[\text{U}^{\text{VI}}\text{O}_2(\text{L1})\text{DMSO}]$  (a),  $[\text{U}^{\text{VI}}\text{O}_2(\text{L2})\text{DMSO}]$  (b), and  $[\text{U}^{\text{VI}}\text{O}_2(\text{L3})]$  (c). The  $C_o/C_R$  was calculated from the absorbance at  $19157\text{ cm}^{-1}$  (a),  $22989\text{ cm}^{-1}$  (b) and  $21322\text{ cm}^{-1}$  (c).

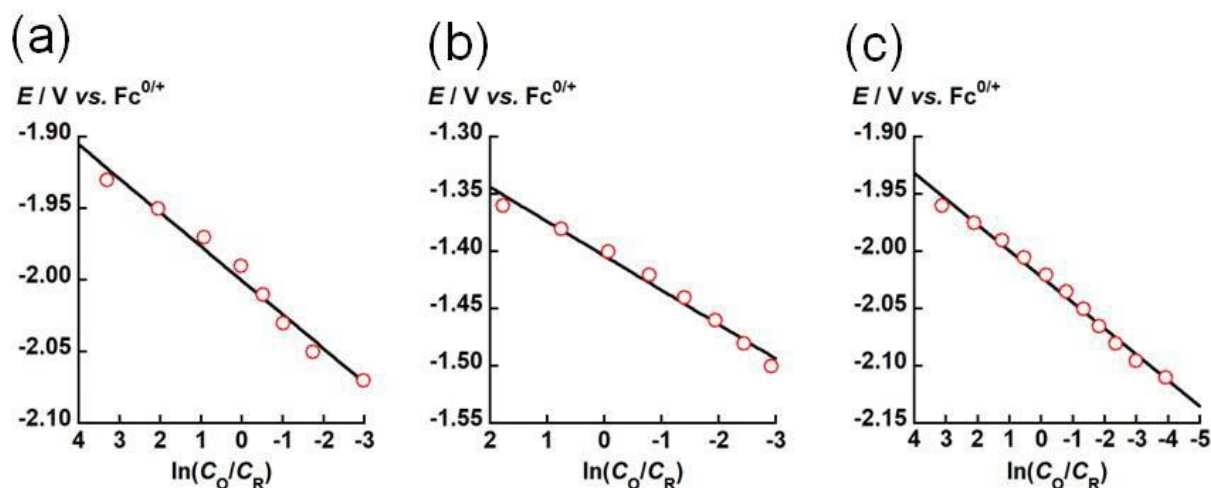

**Figure S12.** Nernstian plot for the spectral change of the electrochemical reduction of  $[\text{UO}_2(\text{Lx})(\text{DMSO})_y]^-$  ( $x = 1-3$ ,  $y = 0-1$ ).  $[\text{UO}_2(\text{L1})\text{DMSO}]^-$  (a),  $[\text{UO}_2(\text{L2})\text{DMSO}]^-$  (b), and  $[\text{UO}_2(\text{L3})]^-$  (c). The  $C_o/C_R$  was calculated from the absorbance at  $19157\text{ cm}^{-1}$  (a),  $25000\text{ cm}^{-1}$  (b) and  $19685\text{ cm}^{-1}$  (c).

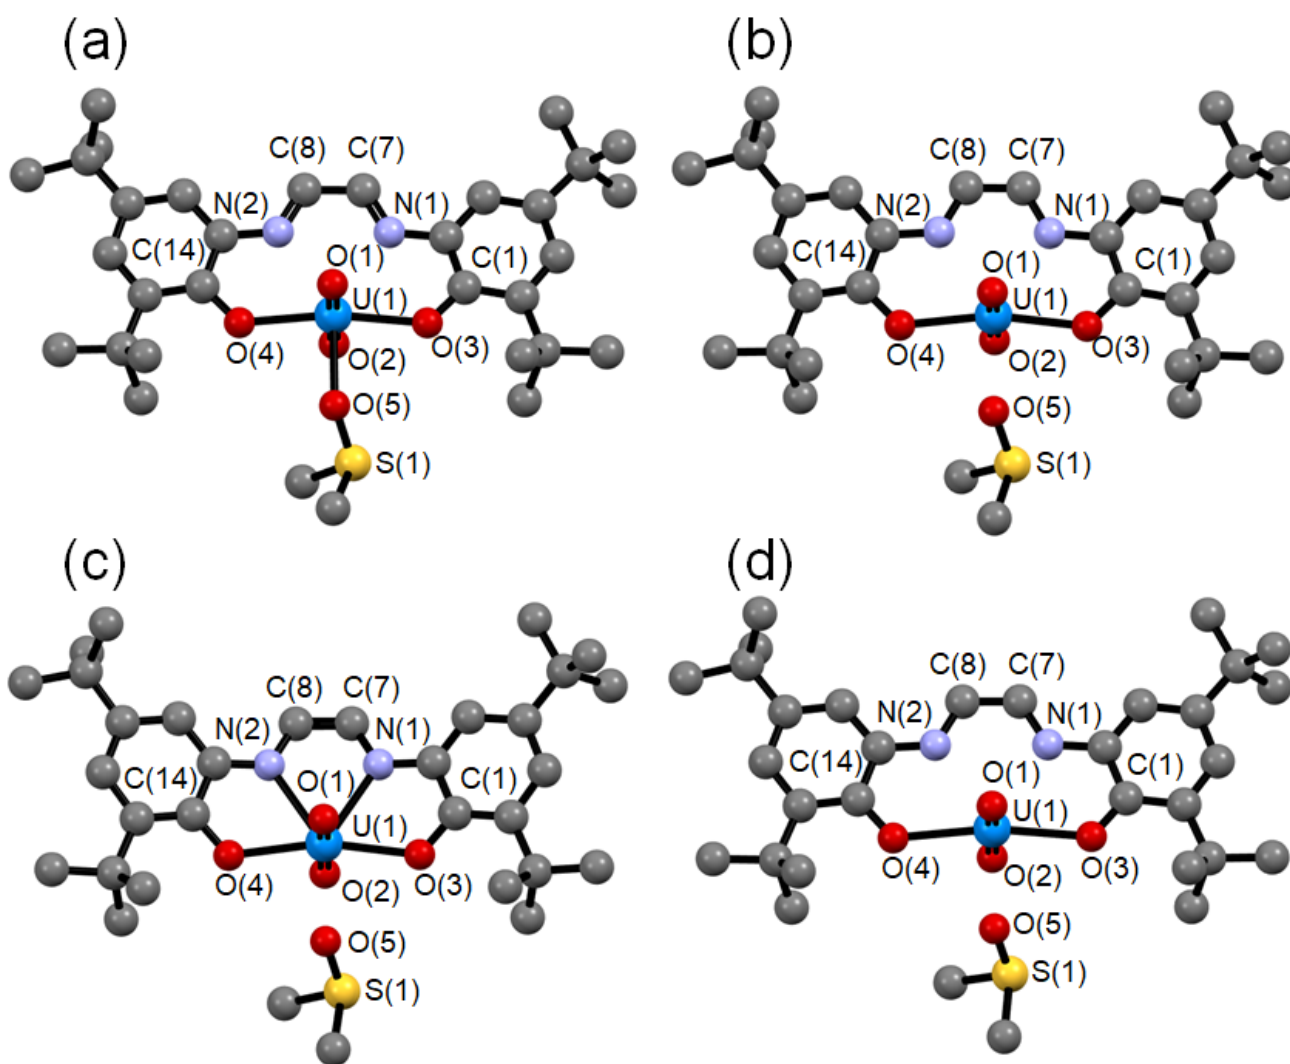

**Figure S13.** The optimized structures of  $[\text{U}^{\text{VI}}\text{O}_2(\text{L1})\text{DMSO}]$  (a),  $[\text{UO}_2(\text{L1})\text{DMSO}]^-$  (b),  $[\text{UO}_2(\text{L1})\text{DMSO}]^{2-}$  ( $S_T = 0$ ) (c), and  $[\text{UO}_2(\text{L1})\text{DMSO}]^{2-}$  ( $S_T = 1$ ) (d). Hydrogen atoms are omitted for clarity.

**Table S6.** The selected bond lengths of calculated structures of  $[\text{U}^{\text{VI}}\text{O}_2(\text{L1})\text{DMSO}]$ ,  $[\text{UO}_2(\text{L1})\text{DMSO}]^-$ ,  $[\text{UO}_2(\text{L1})\text{DMSO}]^{2-}$  ( $S_{\text{T}} = 0$ ), and  $[\text{UO}_2(\text{L1})\text{DMSO}]^{2-}$  ( $S_{\text{T}} = 1$ ) (Å).

|            | $[\text{U}^{\text{VI}}\text{O}_2(\text{L1})\text{DMSO}]$ | $[\text{UO}_2(\text{L1})\text{DMSO}]^-$ | $[\text{UO}_2(\text{L1})\text{DMSO}]^{2-}$<br>( $S_{\text{T}} = 0$ ) | $[\text{UO}_2(\text{L1})\text{DMSO}]^{2-}$<br>( $S_{\text{T}} = 1$ ) |
|------------|----------------------------------------------------------|-----------------------------------------|----------------------------------------------------------------------|----------------------------------------------------------------------|
| U(1)–O(1)  | 1.795                                                    | 1.809                                   | 1.831                                                                | 1.873                                                                |
| U(1)–O(2)  | 1.798                                                    | 1.813                                   | 1.838                                                                | 1.882                                                                |
| U(1)–O(3)  | 2.309                                                    | 2.308                                   | 2.355                                                                | 2.432                                                                |
| U(1)–O(4)  | 2.299                                                    | 2.303                                   | 2.353                                                                | 2.431                                                                |
| U(1)–O(5)  | 2.393                                                    | 2.448                                   | 2.524                                                                | 2.546                                                                |
| U(1)–N(1)  | 2.602                                                    | 2.536                                   | 2.448                                                                | 2.595                                                                |
| U(1)–N(2)  | 2.599                                                    | 2.534                                   | 2.449                                                                | 2.593                                                                |
| C(7)–N(1)  | 1.300                                                    | 1.341                                   | 1.383                                                                | 1.339                                                                |
| C(8)–N(2)  | 1.299                                                    | 1.341                                   | 1.365                                                                | 1.339                                                                |
| C(7)–C(8)  | 1.437                                                    | 1.394                                   | 1.365                                                                | 1.400                                                                |
| C(1)–O(3)  | 1.311                                                    | 1.328                                   | 1.335                                                                | 1.312                                                                |
| C(14)–O(4) | 1.315                                                    | 1.329                                   | 1.335                                                                | 1.313                                                                |

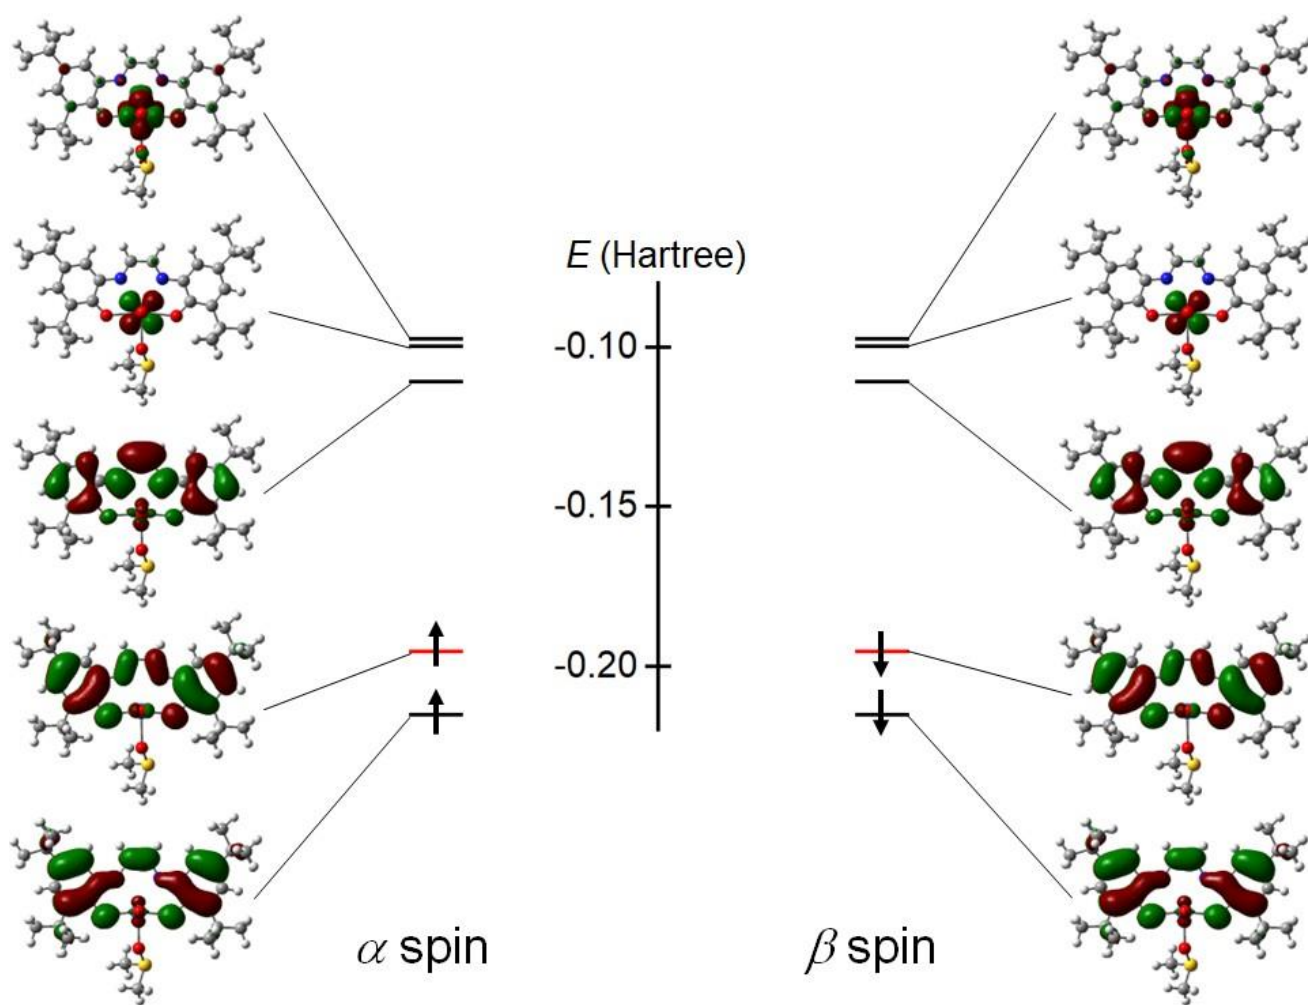

**Figure S14.** Calculated MO energy diagrams of  $[U^{VI}O_2(L1)DMSO]$ .



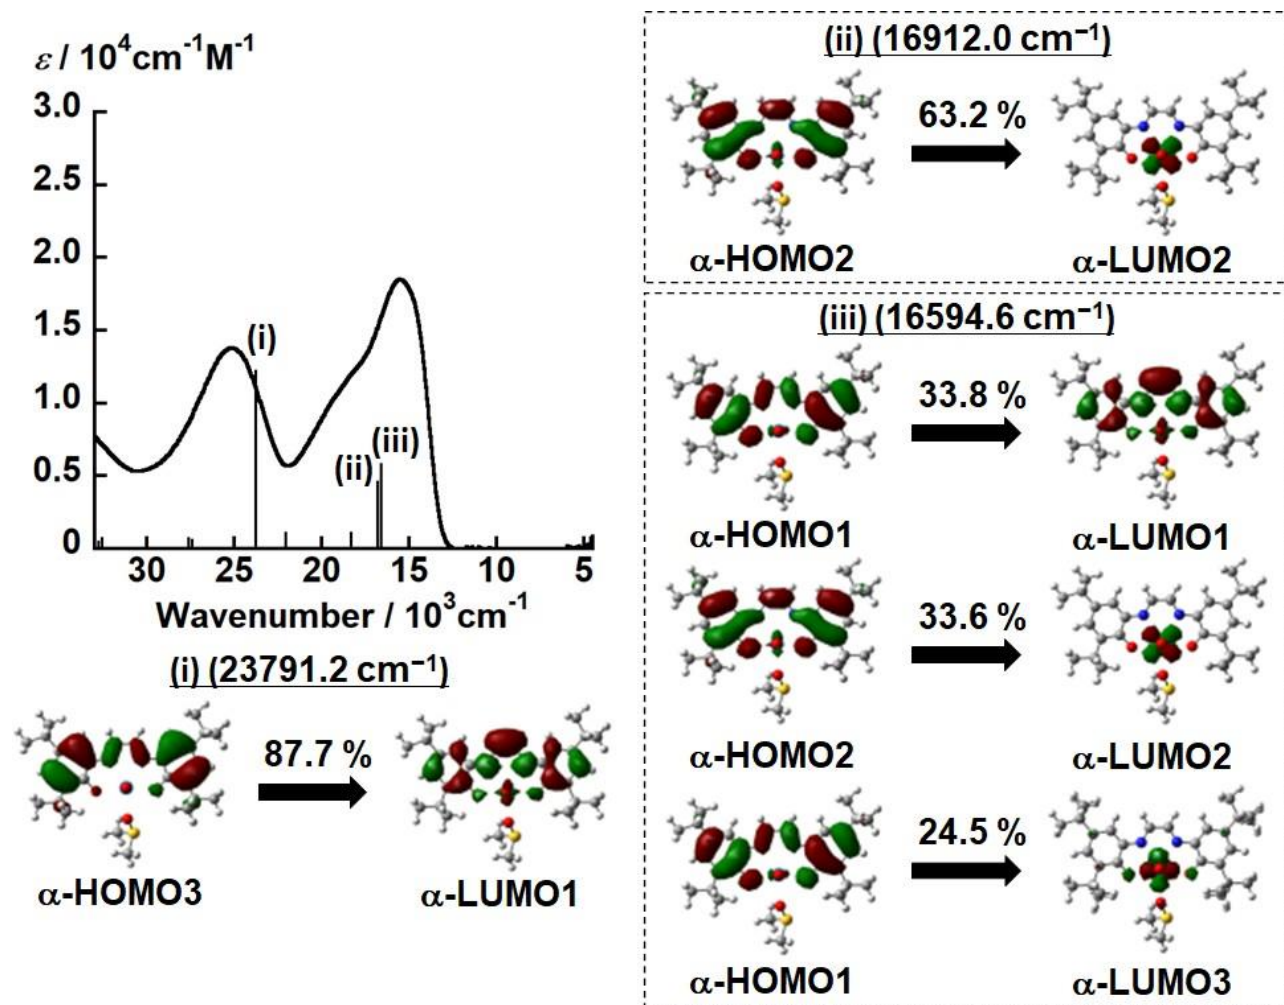

**Figure S15.** UV-vis-NIR spectrum of  $[\text{U}^{\text{VI}}\text{O}_2(\text{L1})\text{DMSO}]$  in DMSO and predicted band positions and intensities of the TD-DFT calculation. The vertical black lines correspond to the calculated transitions for  $[\text{U}^{\text{VI}}\text{O}_2(\text{L1})\text{DMSO}]$ .

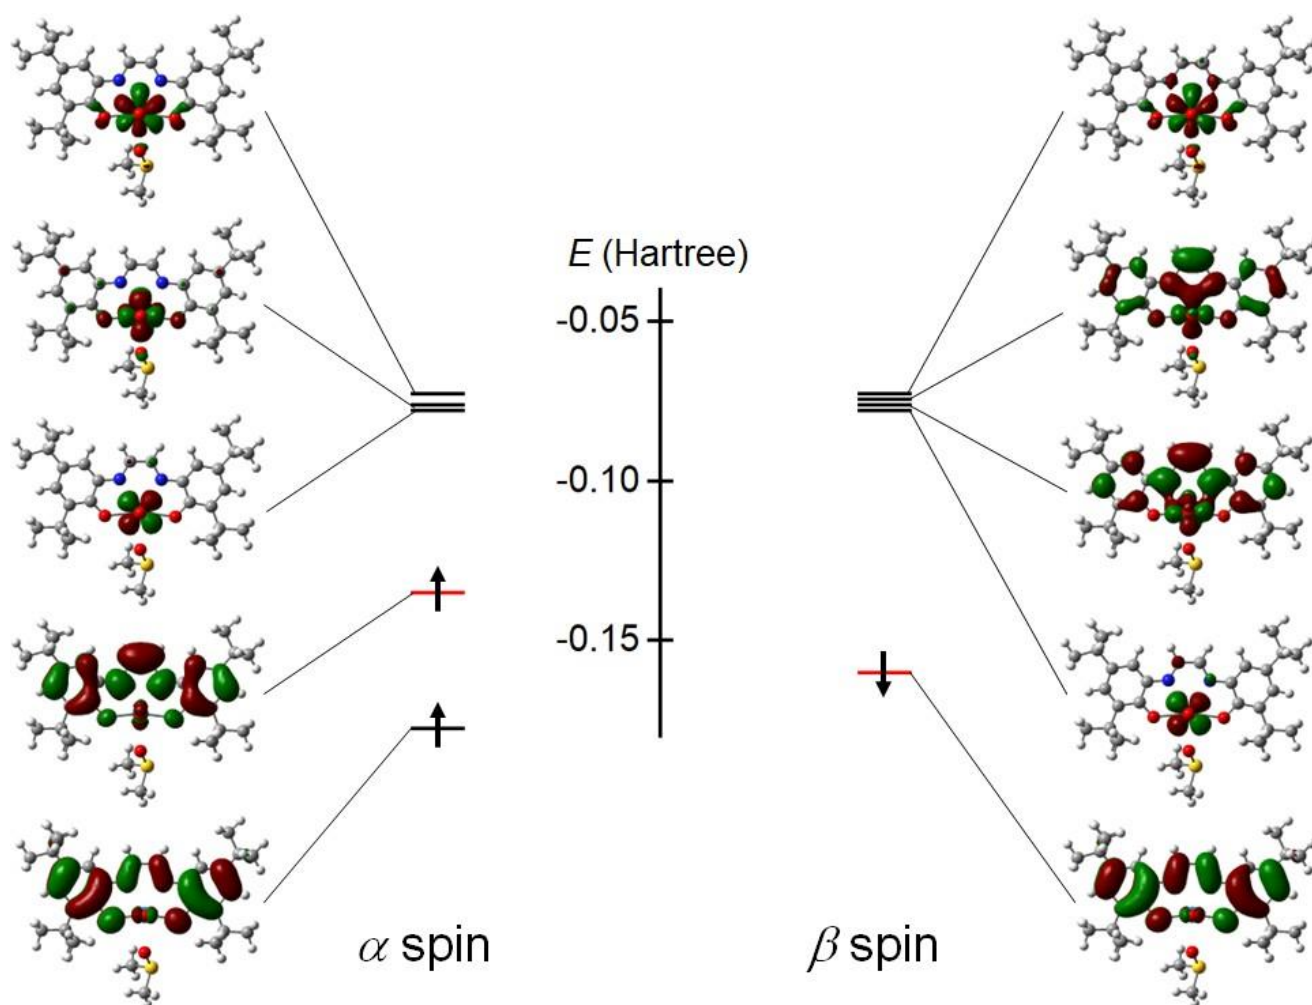

Figure S16. Calculated MO energy diagrams of  $[\text{UO}_2(\text{L1})\text{DMSO}]^-$ .

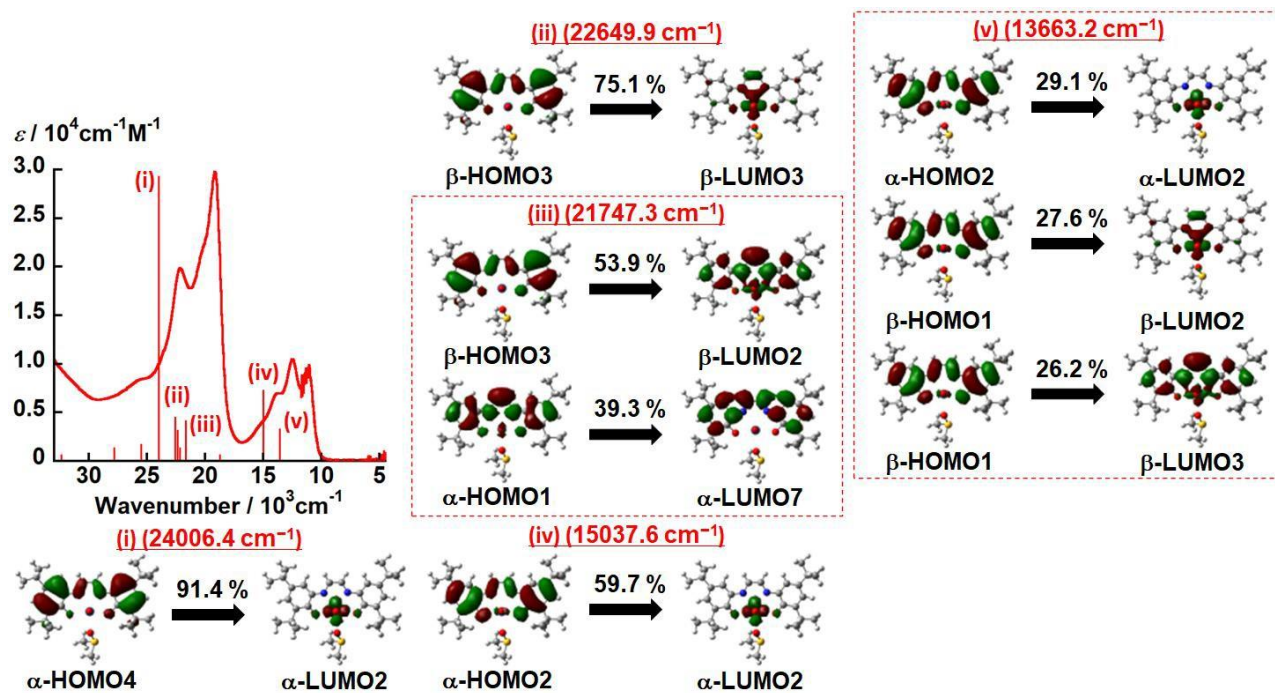

**Figure S17.** UV-vis-NIR spectrum of  $[\text{UO}_2(\text{L1})\text{DMSO}]^-$  in DMSO and predicted band positions and intensities of the TD-DFT calculation. The vertical red lines correspond to the calculated transitions for  $[\text{UO}_2(\text{L1})\text{DMSO}]^-$ .

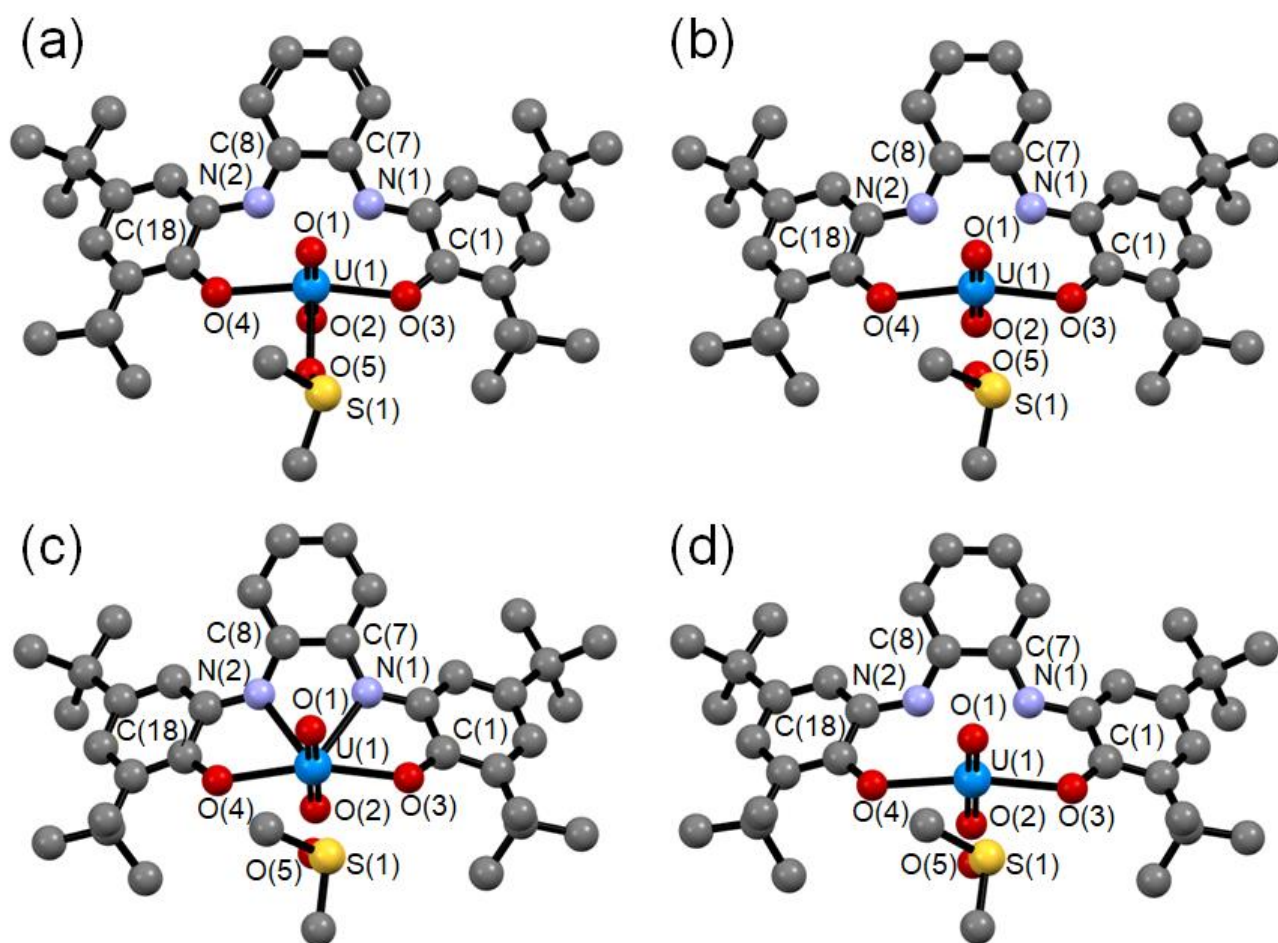

**Figure S18.** The optimized structures of  $[U^{VI}O_2(L2)DMSO]$  (a),  $[UO_2(L2)DMSO]^-$  (b),  $[UO_2(L2)DMSO]^{2-}$  ( $S_T = 0$ ) (c), and  $[UO_2(L2)DMSO]^{2-}$  ( $S_T = 1$ ) (d). Hydrogen atoms are omitted for clarity.

**Table S7.** The selected bond lengths of calculated structures of  $[\text{U}^{\text{VI}}\text{O}_2(\text{L}2)\text{DMSO}]$ ,  $[\text{UO}_2(\text{L}2)\text{DMSO}]^-$ ,  $[\text{UO}_2(\text{L}2)\text{DMSO}]^{2-}$  ( $S_{\text{T}} = 0$ ), and  $[\text{UO}_2(\text{L}2)\text{DMSO}]^{2-}$  ( $S_{\text{T}} = 1$ ) (Å).

|            | $[\text{UO}_2(\text{L}2)\text{DMSO}]$ | $[\text{UO}_2(\text{L}2)\text{DMSO}]^-$ | $[\text{UO}_2(\text{L}2)\text{DMSO}]^{2-}$<br>( $S_{\text{T}} = 0$ ) | $[\text{UO}_2(\text{L}2)\text{DMSO}]^{2-}$<br>( $S_{\text{T}} = 1$ ) |
|------------|---------------------------------------|-----------------------------------------|----------------------------------------------------------------------|----------------------------------------------------------------------|
| U(1)–O(1)  | 1.799                                 | 1.814                                   | 1.836                                                                | 1.881                                                                |
| U(1)–O(2)  | 1.795                                 | 1.809                                   | 1.828                                                                | 1.871                                                                |
| U(1)–O(3)  | 2.306                                 | 2.314                                   | 2.343                                                                | 2.427                                                                |
| U(1)–O(4)  | 2.306                                 | 2.312                                   | 2.341                                                                | 2.427                                                                |
| U(1)–O(5)  | 2.393                                 | 2.451                                   | 2.523                                                                | 2.545                                                                |
| U(1)–N(1)  | 2.585                                 | 2.514                                   | 2.436                                                                | 2.584                                                                |
| U(1)–N(2)  | 2.578                                 | 2.511                                   | 2.436                                                                | 2.584                                                                |
| C(7)–N(1)  | 1.327                                 | 1.355                                   | 1.384                                                                | 1.351                                                                |
| C(8)–N(2)  | 1.326                                 | 1.354                                   | 1.384                                                                | 1.351                                                                |
| C(7)–C(8)  | 1.480                                 | 1.461                                   | 1.447                                                                | 1.470                                                                |
| C(1)–O(3)  | 1.310                                 | 1.325                                   | 1.334                                                                | 1.311                                                                |
| C(18)–O(4) | 1.312                                 | 1.326                                   | 1.334                                                                | 1.311                                                                |



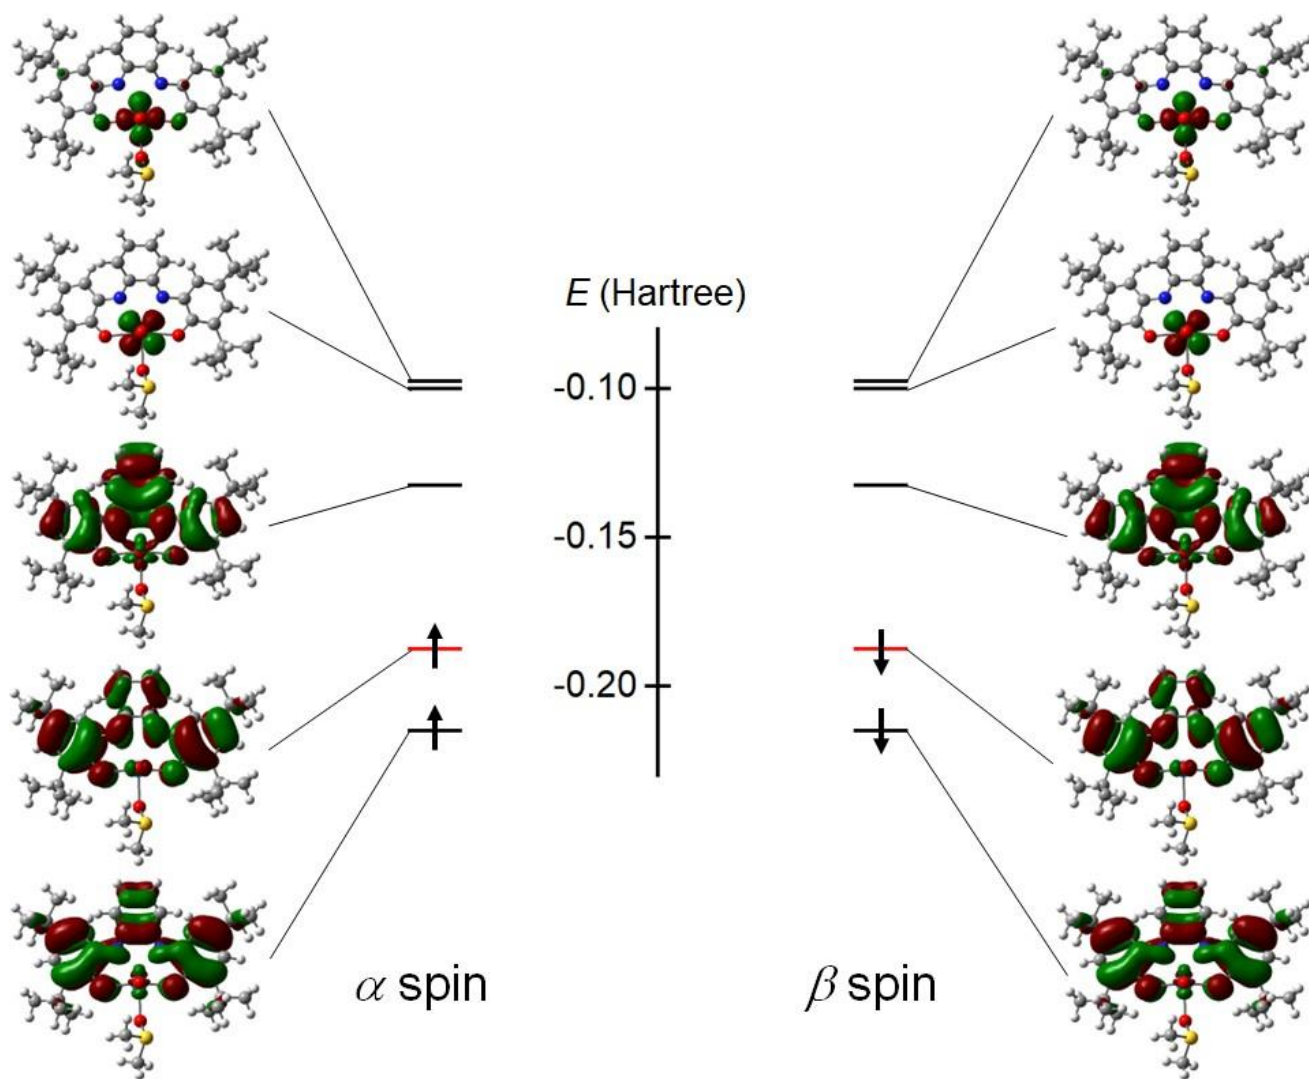

**Figure S19.** Calculated MO energy diagrams of  $[U^{VI}O_2(L2)DMSO]$ .

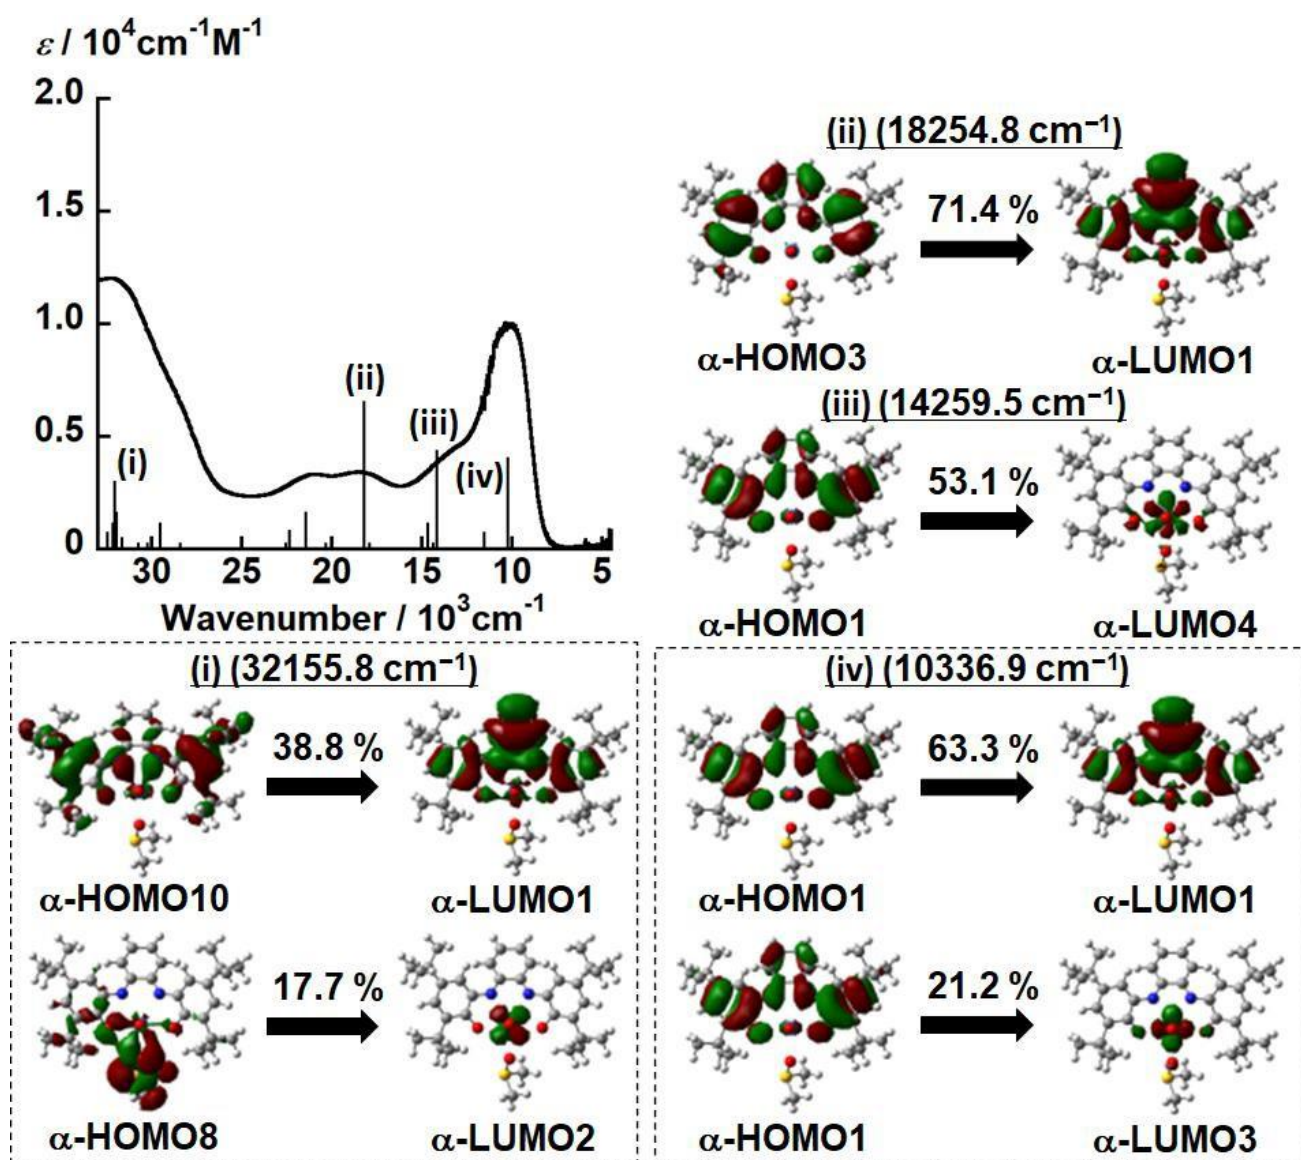

**Figure S20.** UV-vis-NIR spectrum of  $[U^{VI}O_2(L2)DMSO]$  in DMSO and predicted band positions and intensities of the TD-DFT calculation. The vertical black lines correspond to the calculated transitions for  $[U^{VI}O_2(L2)DMSO]$ .

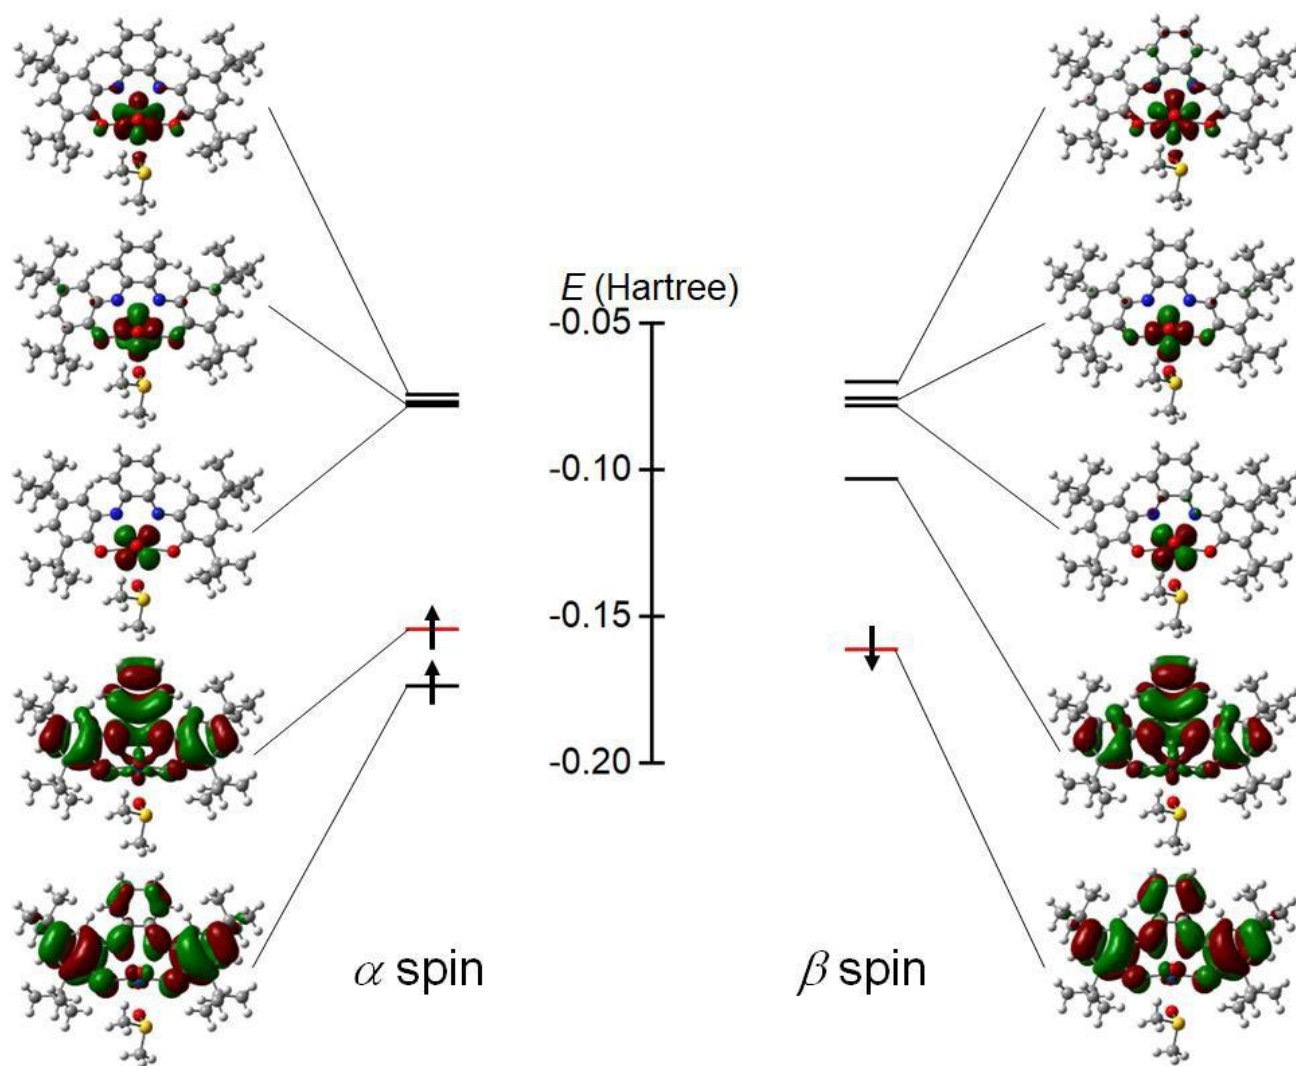

**Figure S21.** Calculated MO energy diagrams of  $[\text{UO}_2(\text{L2})\text{DMSO}]^-$ .



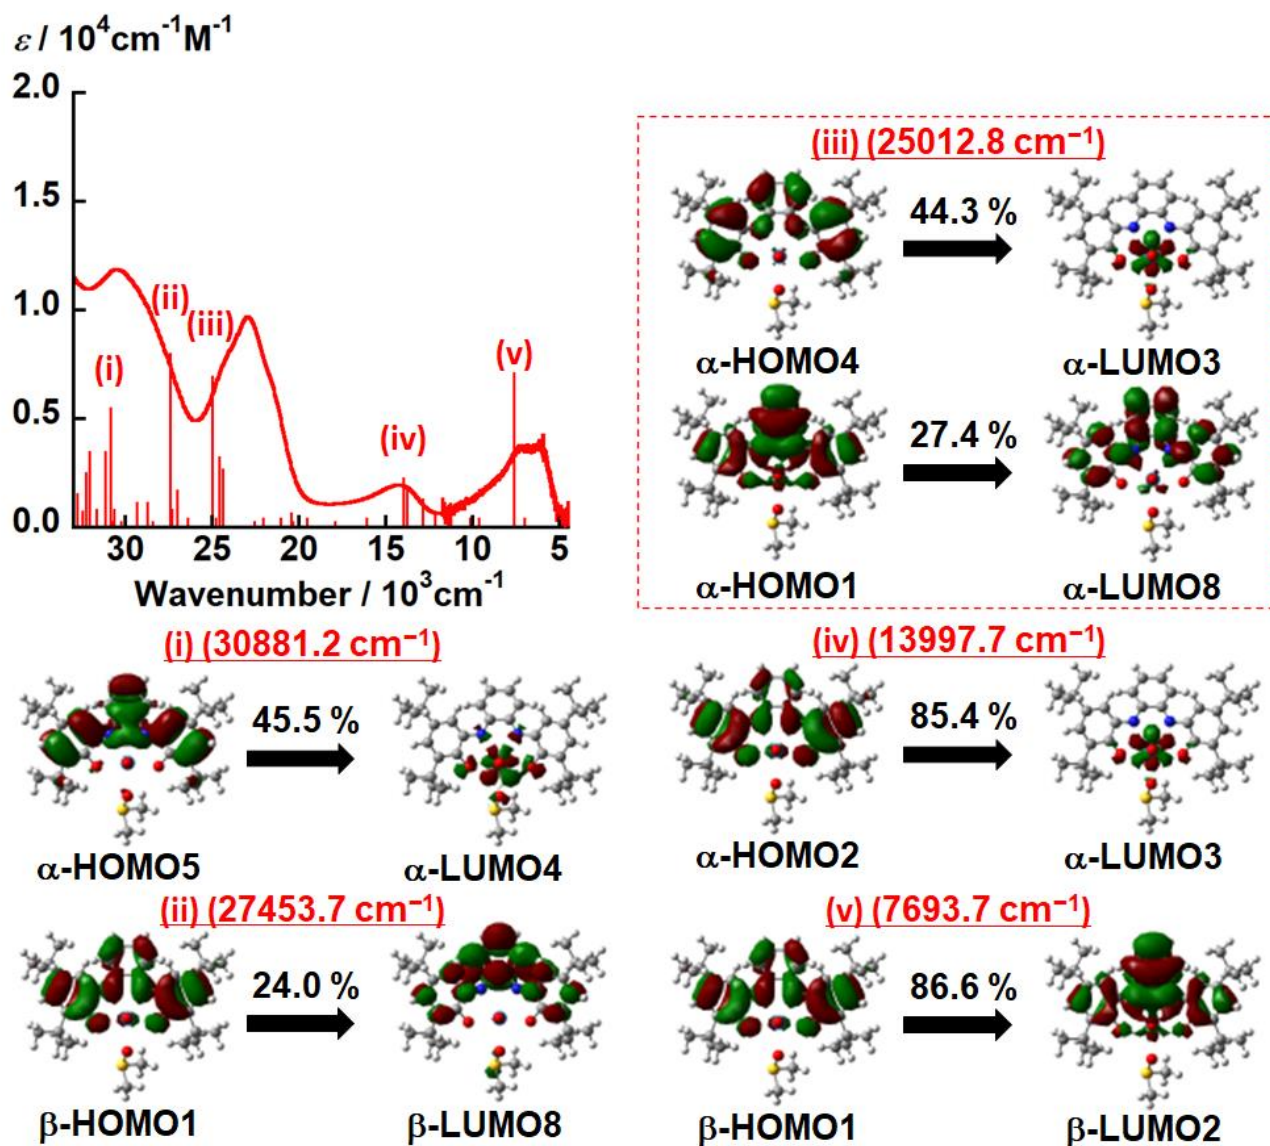

**Figure S22.** UV-vis-NIR spectrum of  $[\text{UO}_2(\text{L2})\text{DMSO}]^-$  in DMSO and predicted band positions and intensities of the TD-DFT calculation. The vertical red lines correspond to the calculated transitions for  $[\text{UO}_2(\text{L2})\text{DMSO}]^-$ .

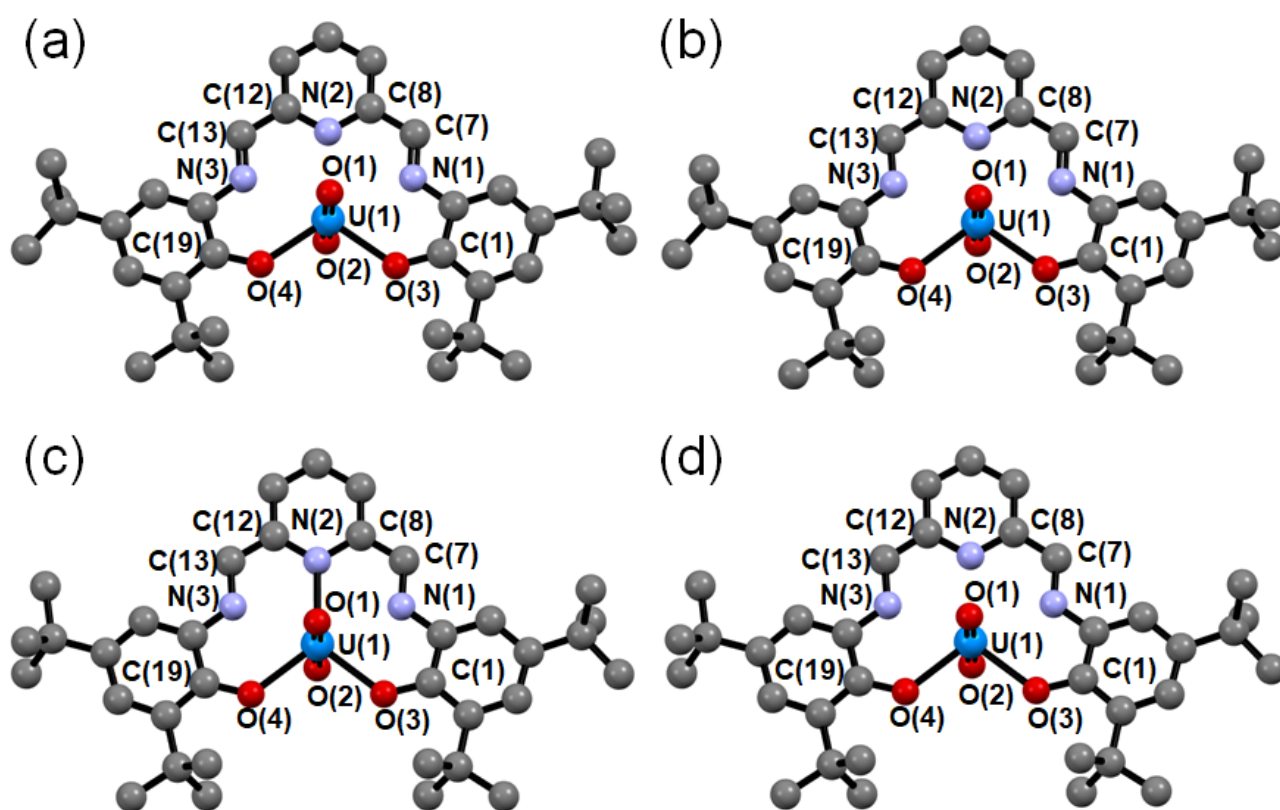

**Figure S23.** The optimized structures of  $[U^{VI}O_2(L3)]$  (a),  $[UO_2(L3)]^-$  (b),  $[UO_2(L3)]^{2-}$  ( $S_T = 0$ ) (c), and  $[UO_2(L3)]^{2-}$  ( $S_T = 1$ ) (d). Hydrogen atoms are omitted for clarity.

**Table S8.** The selected bond lengths of calculated structures of  $[\text{U}^{\text{VI}}\text{O}_2(\text{L3})]$ ,  $[\text{UO}_2(\text{L3})]^-$ ,  $[\text{UO}_2(\text{L3})]^{2-}$  ( $S_{\text{T}} = 0$ ), and  $[\text{UO}_2(\text{L3})]^{2-}$  ( $S_{\text{T}} = 1$ ) (Å).

|             | $[\text{U}^{\text{VI}}\text{O}_2(\text{L3})]$ | $[\text{UO}_2(\text{L3})]^-$ | $[\text{UO}_2(\text{L3})]^{2-}$<br>( $S_{\text{T}} = 0$ ) | $[\text{UO}_2(\text{L3})]^{2-}$<br>( $S_{\text{T}} = 1$ ) |
|-------------|-----------------------------------------------|------------------------------|-----------------------------------------------------------|-----------------------------------------------------------|
| U(1)–O(1)   | 1.791                                         | 1.804                        | 1.821                                                     | 1.815                                                     |
| U(1)–O(2)   | 1.791                                         | 1.804                        | 1.821                                                     | 1.815                                                     |
| U(1)–O(3)   | 2.302                                         | 2.325                        | 2.336                                                     | 2.319                                                     |
| U(1)–O(4)   | 2.298                                         | 2.309                        | 2.346                                                     | 2.320                                                     |
| U(1)–N(1)   | 2.637                                         | 2.608                        | 2.564                                                     | 2.535                                                     |
| U(1)–N(2)   | 2.593                                         | 2.519                        | 2.441                                                     | 2.533                                                     |
| U(1)–N(3)   | 2.635                                         | 2.572                        | 2.584                                                     | 2.536                                                     |
| C(7)–N(1)   | 1.289                                         | 1.303                        | 1.341                                                     | 1.346                                                     |
| C(7)–C(8)   | 1.455                                         | 1.438                        | 1.402                                                     | 1.413                                                     |
| C(8)–N(2)   | 1.349                                         | 1.371                        | 1.406                                                     | 1.374                                                     |
| C(12)–N(2)  | 1.349                                         | 1.379                        | 1.398                                                     | 1.375                                                     |
| C(12)–C(13) | 1.455                                         | 1.420                        | 1.414                                                     | 1.412                                                     |
| C(13)–N(3)  | 1.288                                         | 1.321                        | 1.329                                                     | 1.346                                                     |
| C(1)–O(3)   | 1.312                                         | 1.319                        | 1.329                                                     | 1.330                                                     |
| C(19)–O(4)  | 1.314                                         | 1.326                        | 1.325                                                     | 1.331                                                     |

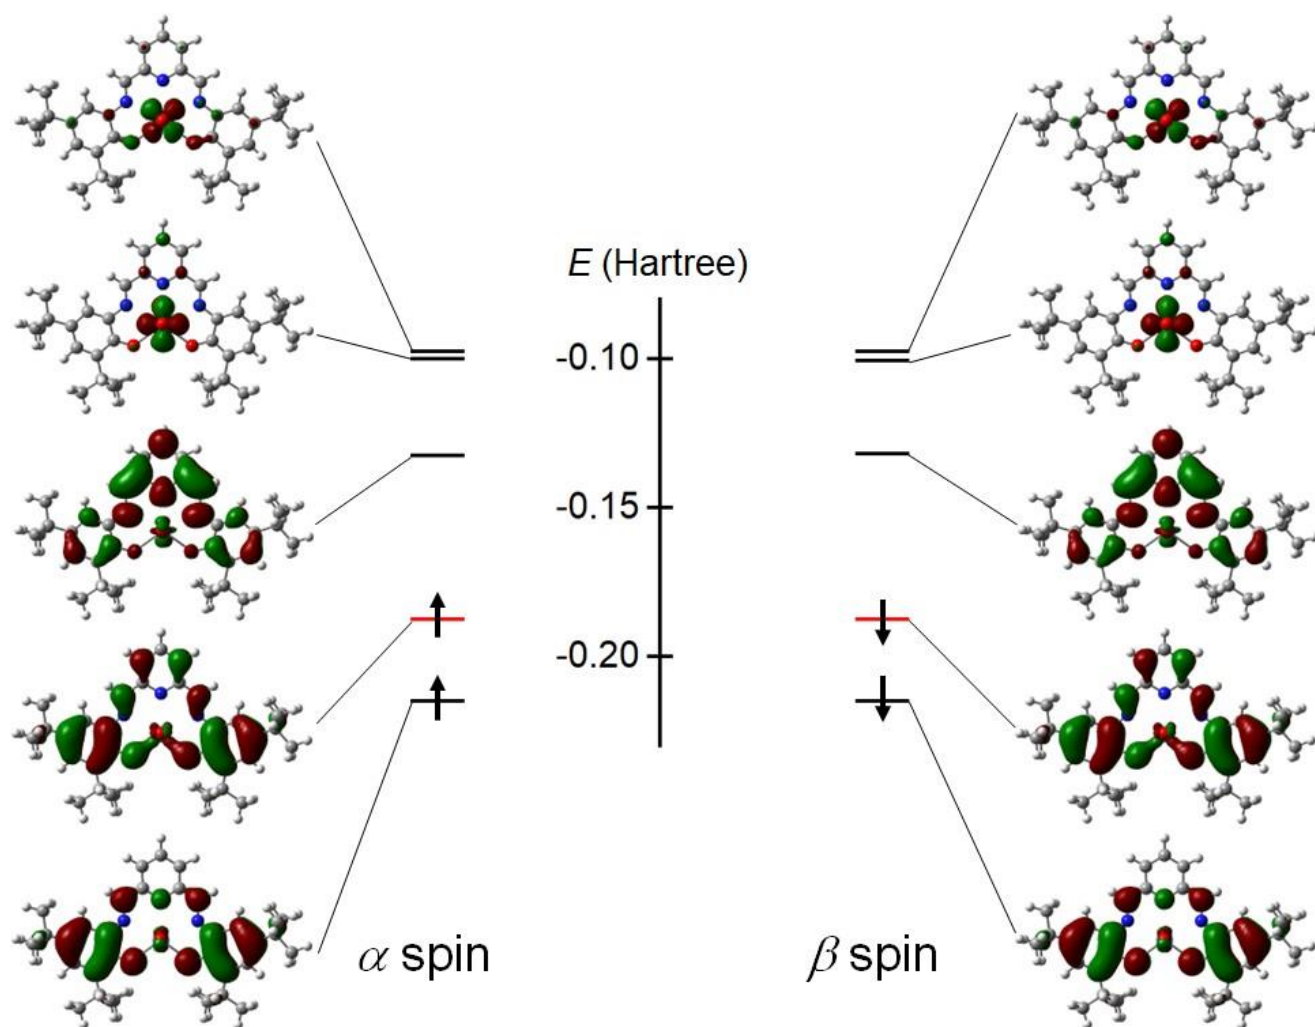

**Figure S24.** Calculated MO energy diagrams of  $[U^{VI}O_2(L3)]$ .

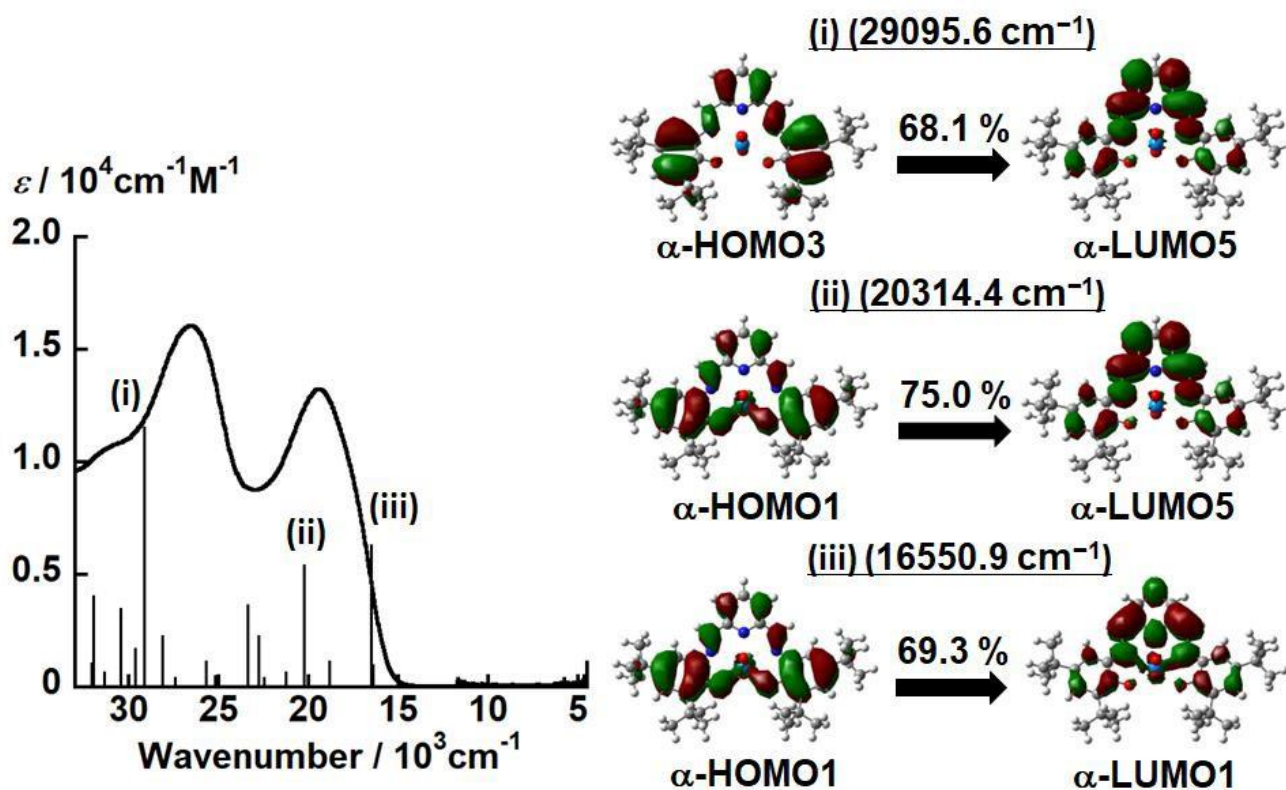

**Figure S25.** UV-vis-NIR spectrum of  $[U^{VI}O_2(L3)]$  in DMSO and predicted band positions and intensities of the TD-DFT calculation. The vertical black lines correspond to the calculated transitions for  $[U^{VI}O_2(L3)]$ .

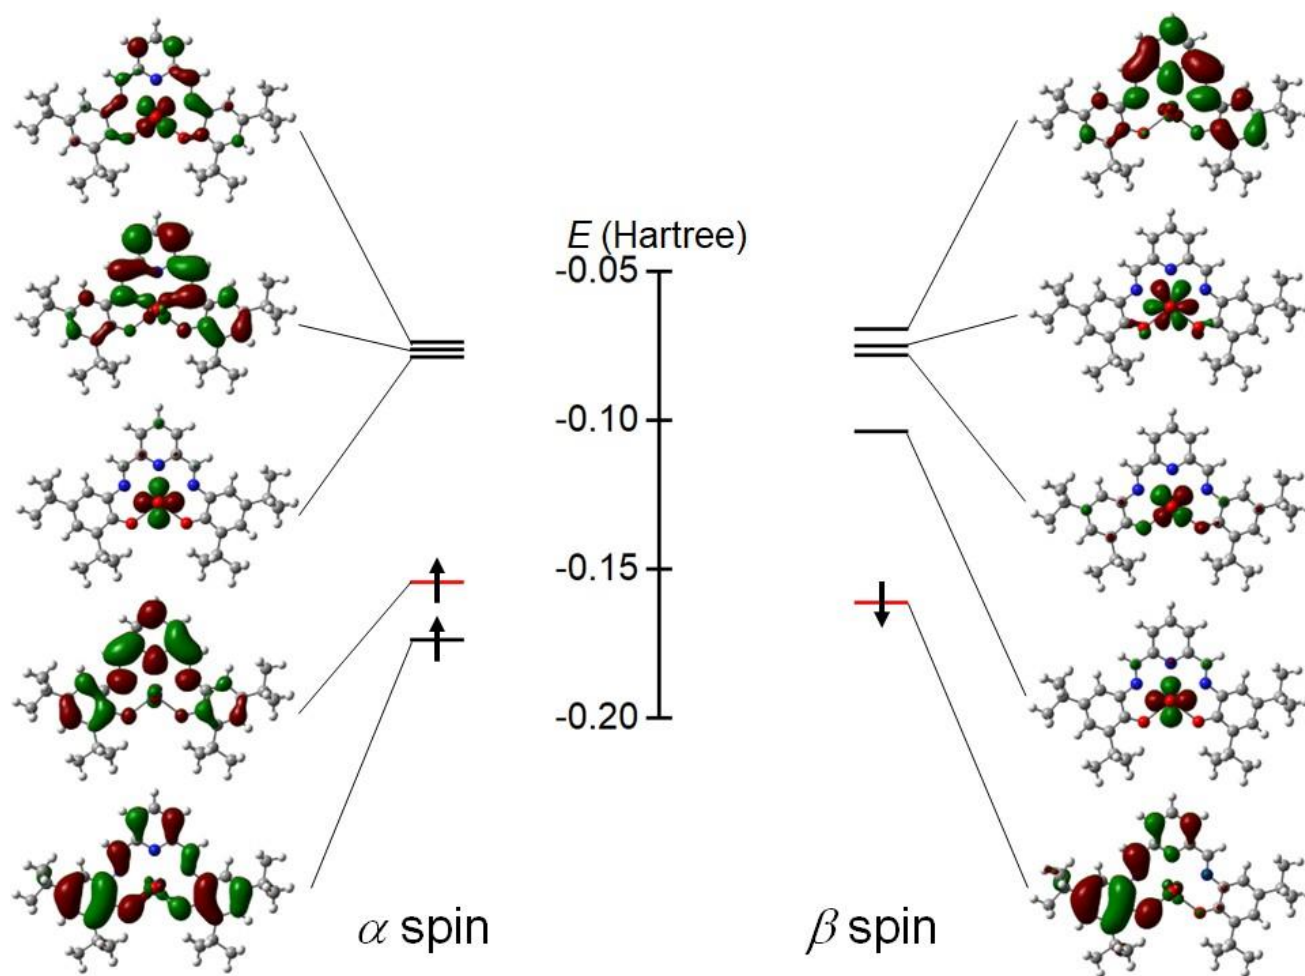

**Figure S26.** Calculated MO energy diagrams of  $[\text{UO}_2(\text{L3})]^-$ .



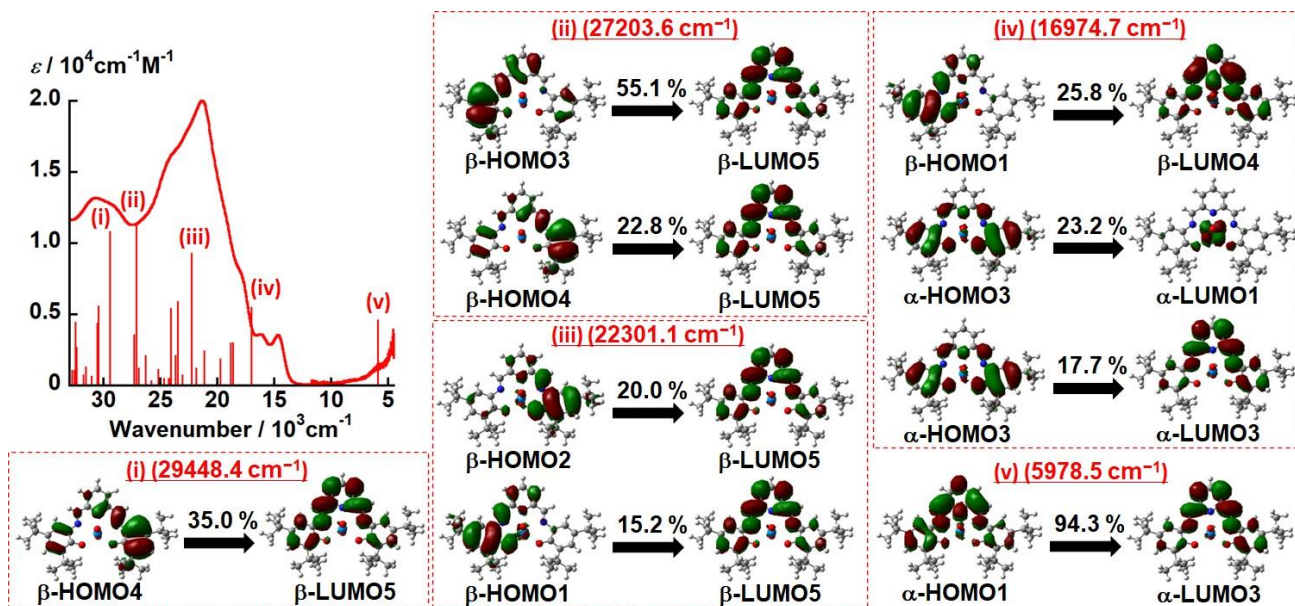

**Figure S27.** UV-vis-NIR spectrum of  $[\text{UO}_2(\text{L3})]^-$  in DMSO and predicted band positions and intensities of the TD-DFT calculation. The vertical red lines correspond to the calculated transitions for  $[\text{UO}_2(\text{L3})]^-$ .

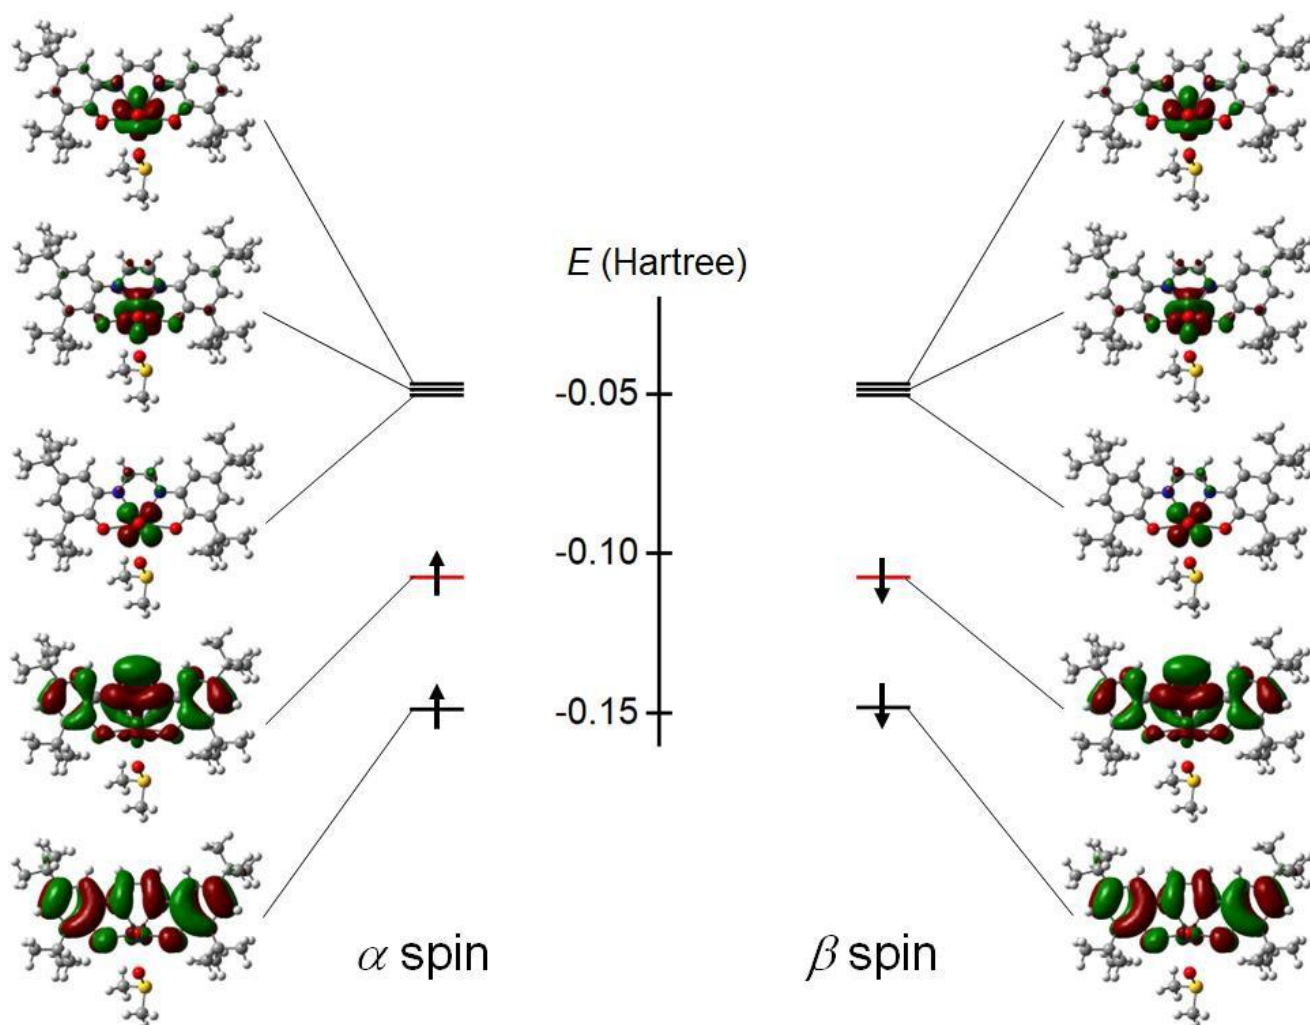

**Figure S28.** Calculated MO energy diagrams of  $[\text{UO}_2(\text{L1})\text{DMSO}]^{2-}$  ( $S_T = 0$ ).



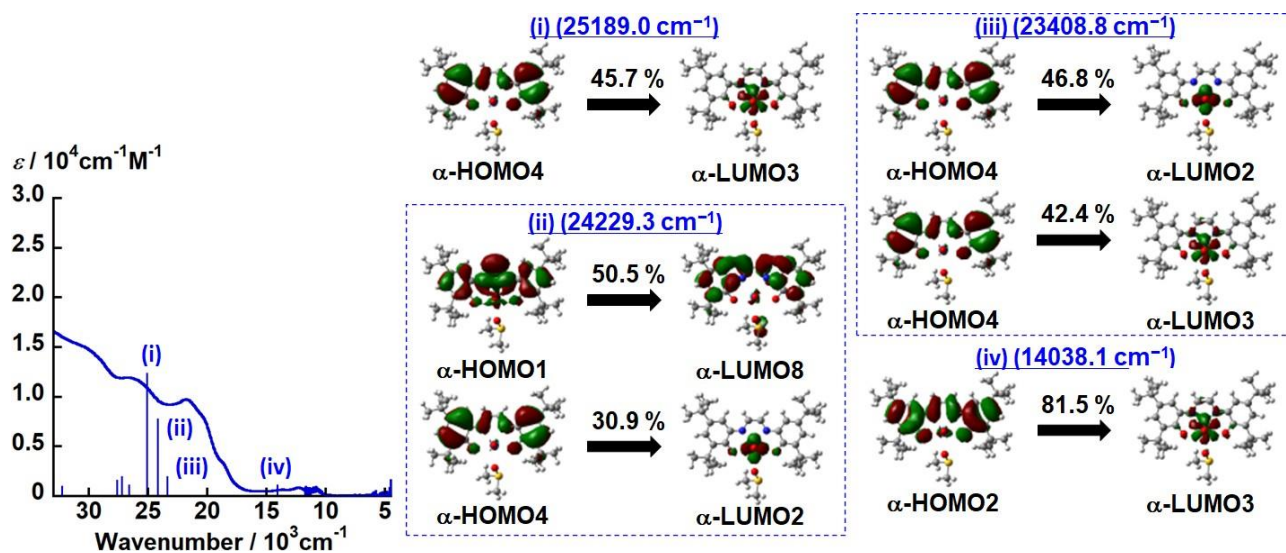

**Figure S29.** UV-vis-NIR spectrum of  $[\text{UO}_2(\text{L1})\text{DMSO}]^{2-}$  in DMSO and predicted band positions and intensities of the TD-DFT calculation. The vertical blue lines correspond to the calculated transitions for  $[\text{UO}_2(\text{L1})\text{DMSO}]^{2-}$  with  $S_T = 0$ .

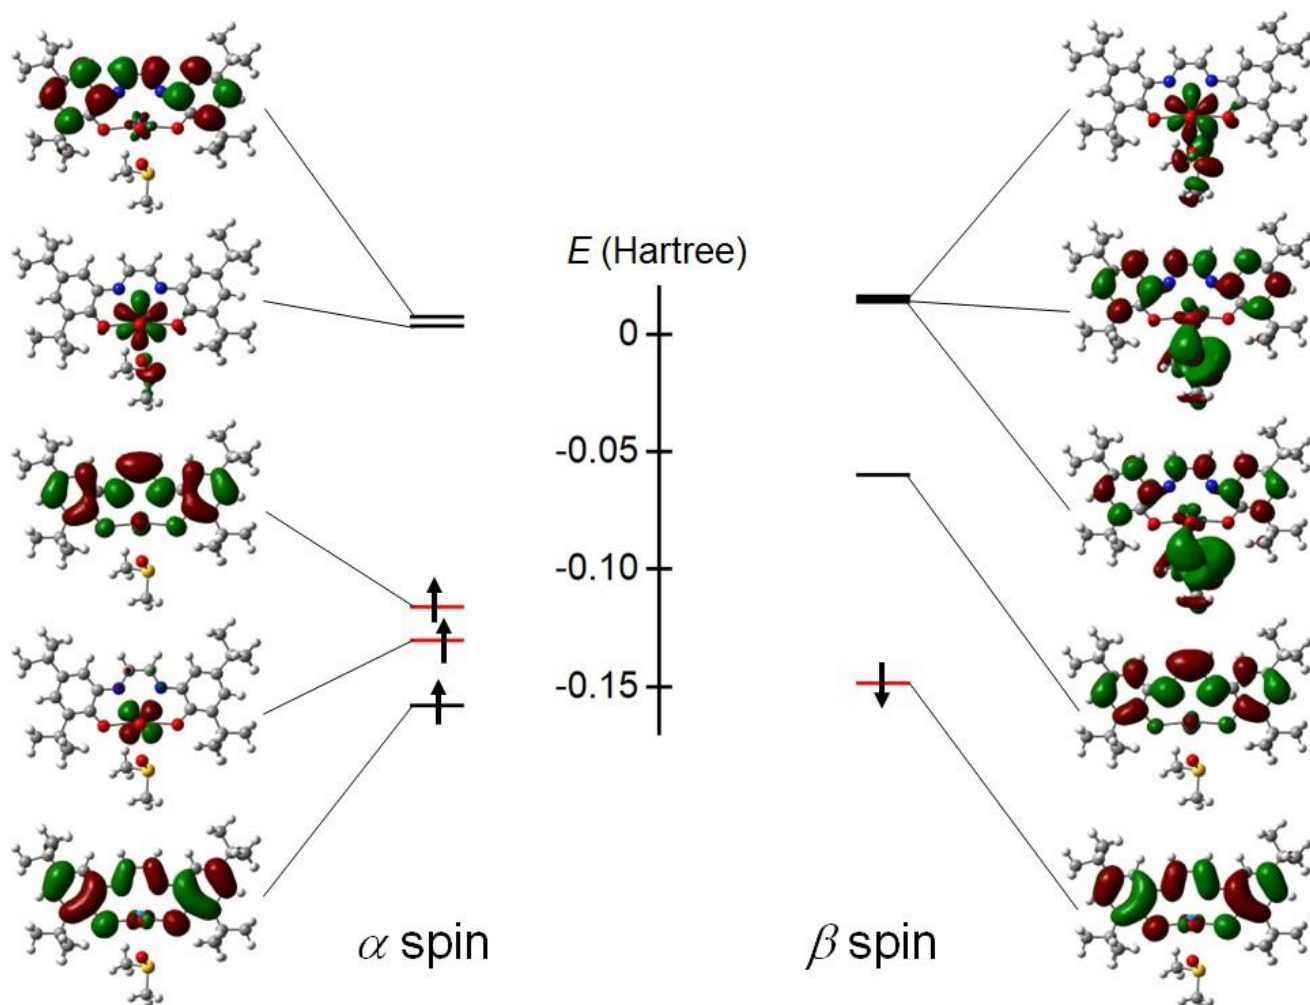

**Figure S30.** Calculated MO energy diagrams of  $[\text{UO}_2(\text{L1})\text{DMSO}]^{2-}$  ( $S_T = 1$ ).

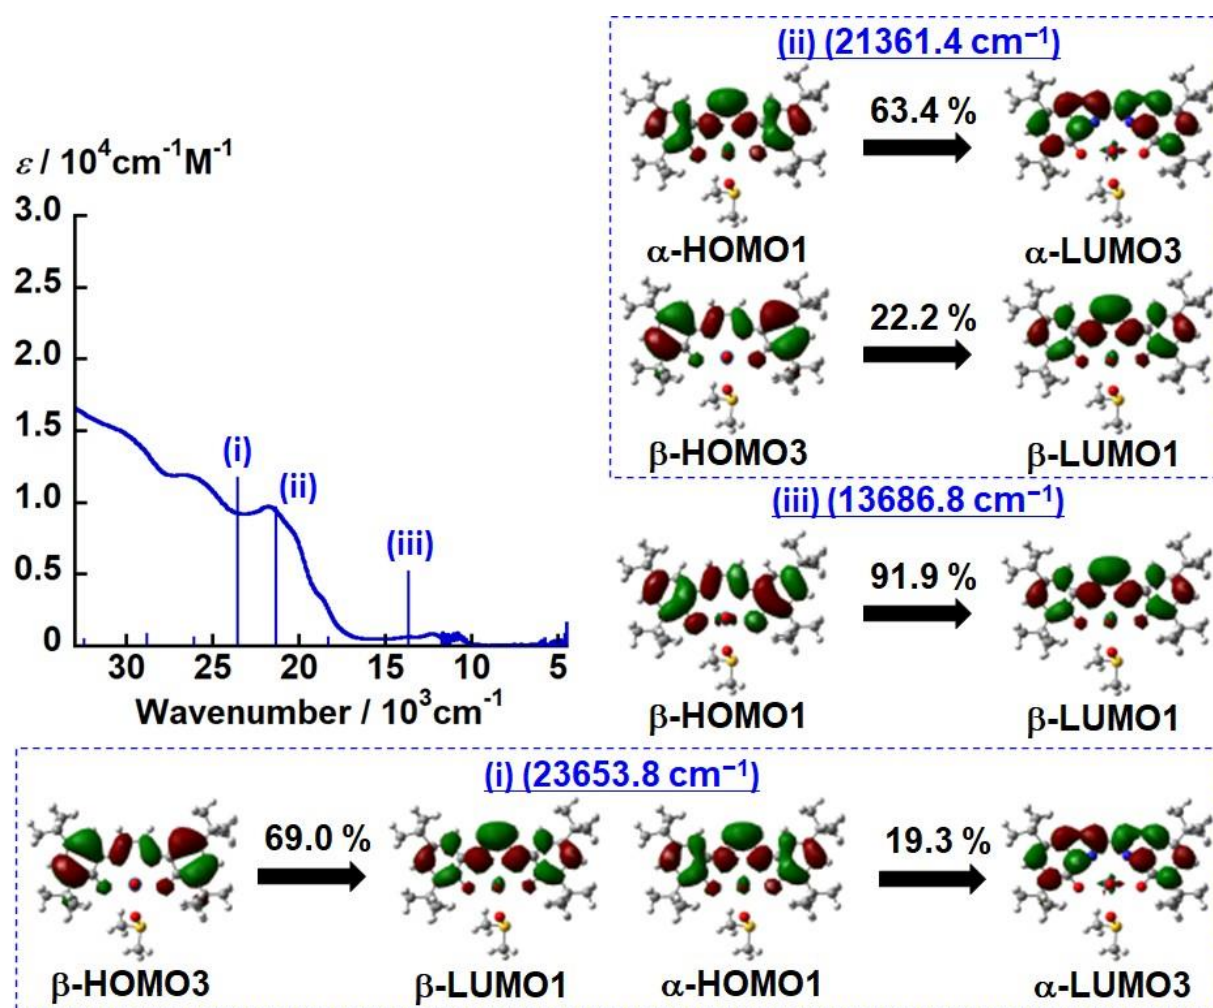

**Figure S31.** UV-vis-NIR spectrum of  $[\text{UO}_2(\text{L1})\text{DMSO}]^{2-}$  in DMSO and predicted band positions and intensities of the TD-DFT calculation. The vertical blue lines correspond to the calculated transitions for  $[\text{UO}_2(\text{L1})\text{DMSO}]^{2-}$  with  $S_T = 1$ .

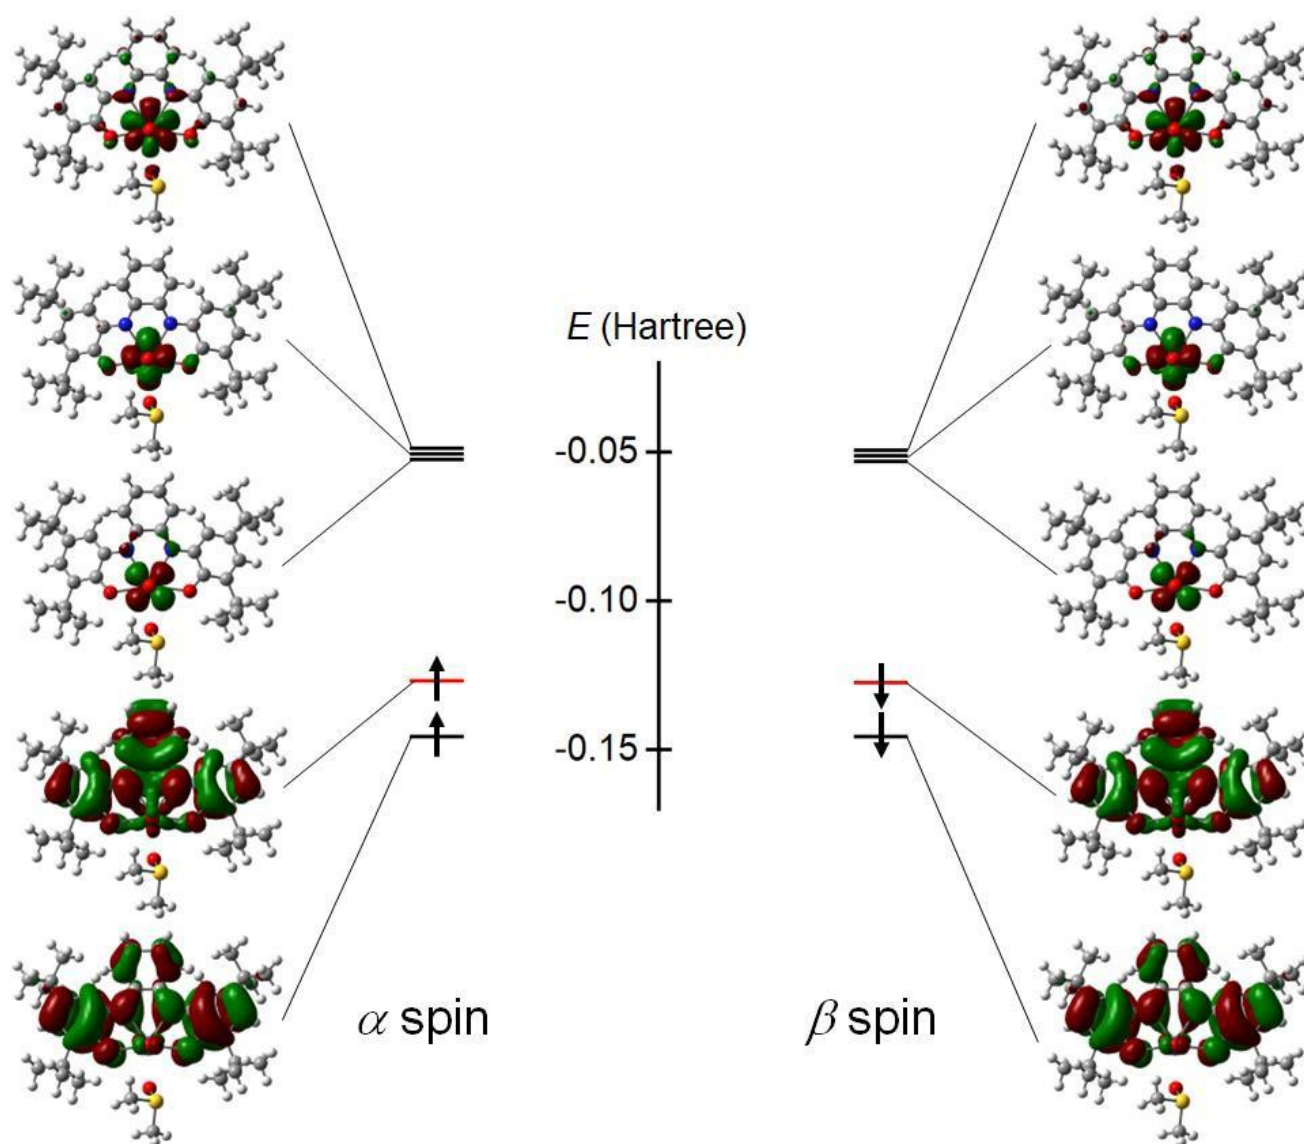

**Figure S32.** Calculated MO energy diagrams of  $[\text{UO}_2(\text{L2})\text{DMSO}]^{2-}$  ( $S_T = 0$ ).



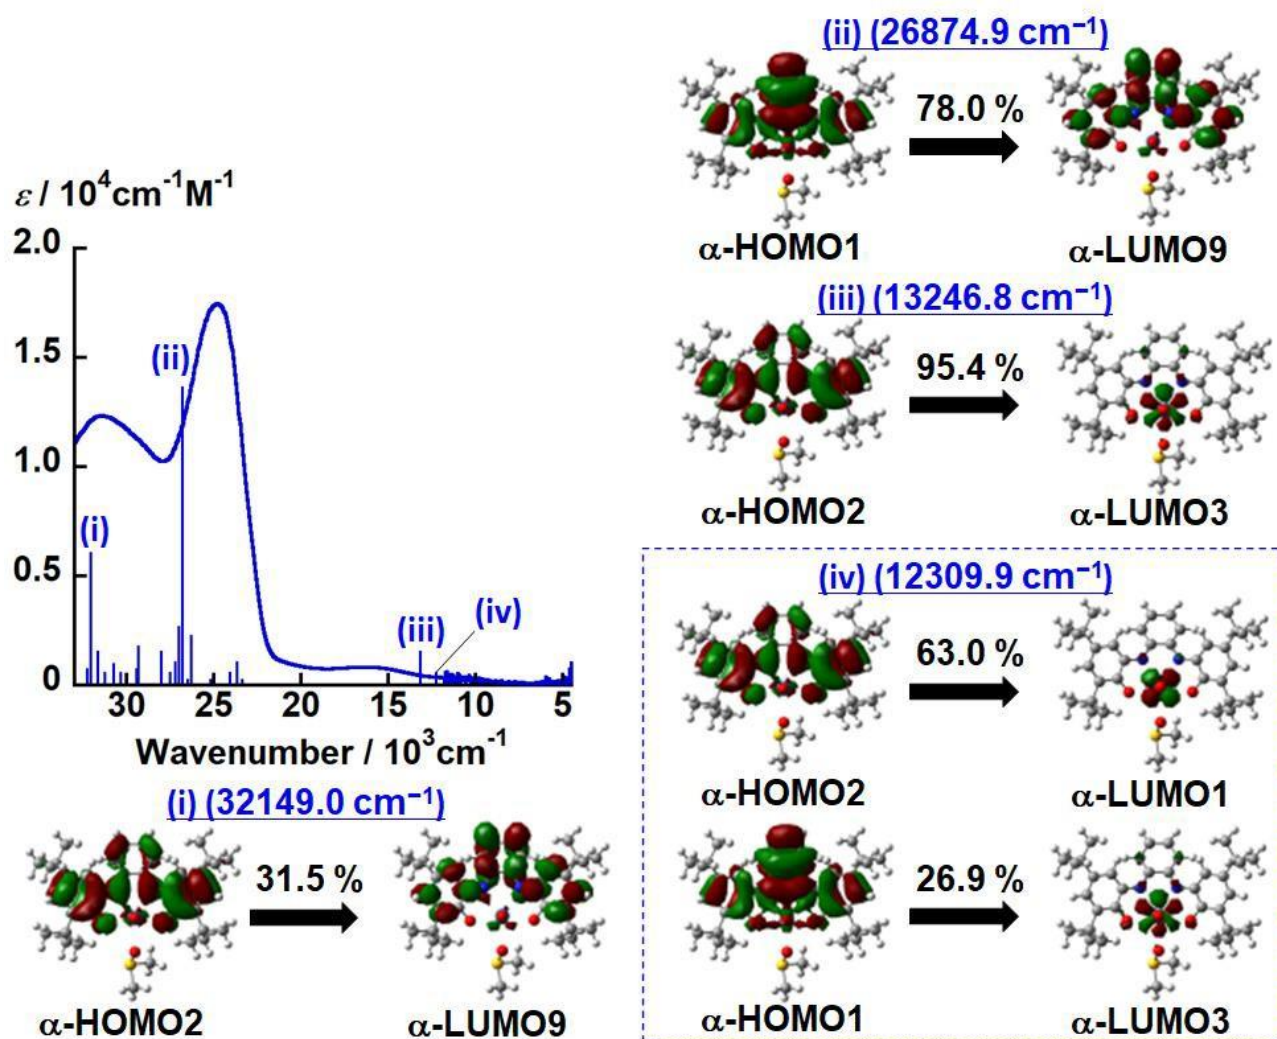

**Figure S33.** UV-vis-NIR spectrum of  $[\text{UO}_2(\text{L2})\text{DMSO}]^{2-}$  in DMSO and predicted band positions and intensities of the TD-DFT calculation. The vertical blue lines correspond to the calculated transitions for  $[\text{UO}_2(\text{L2})\text{DMSO}]^{2-}$  with  $S_T = 0$ .

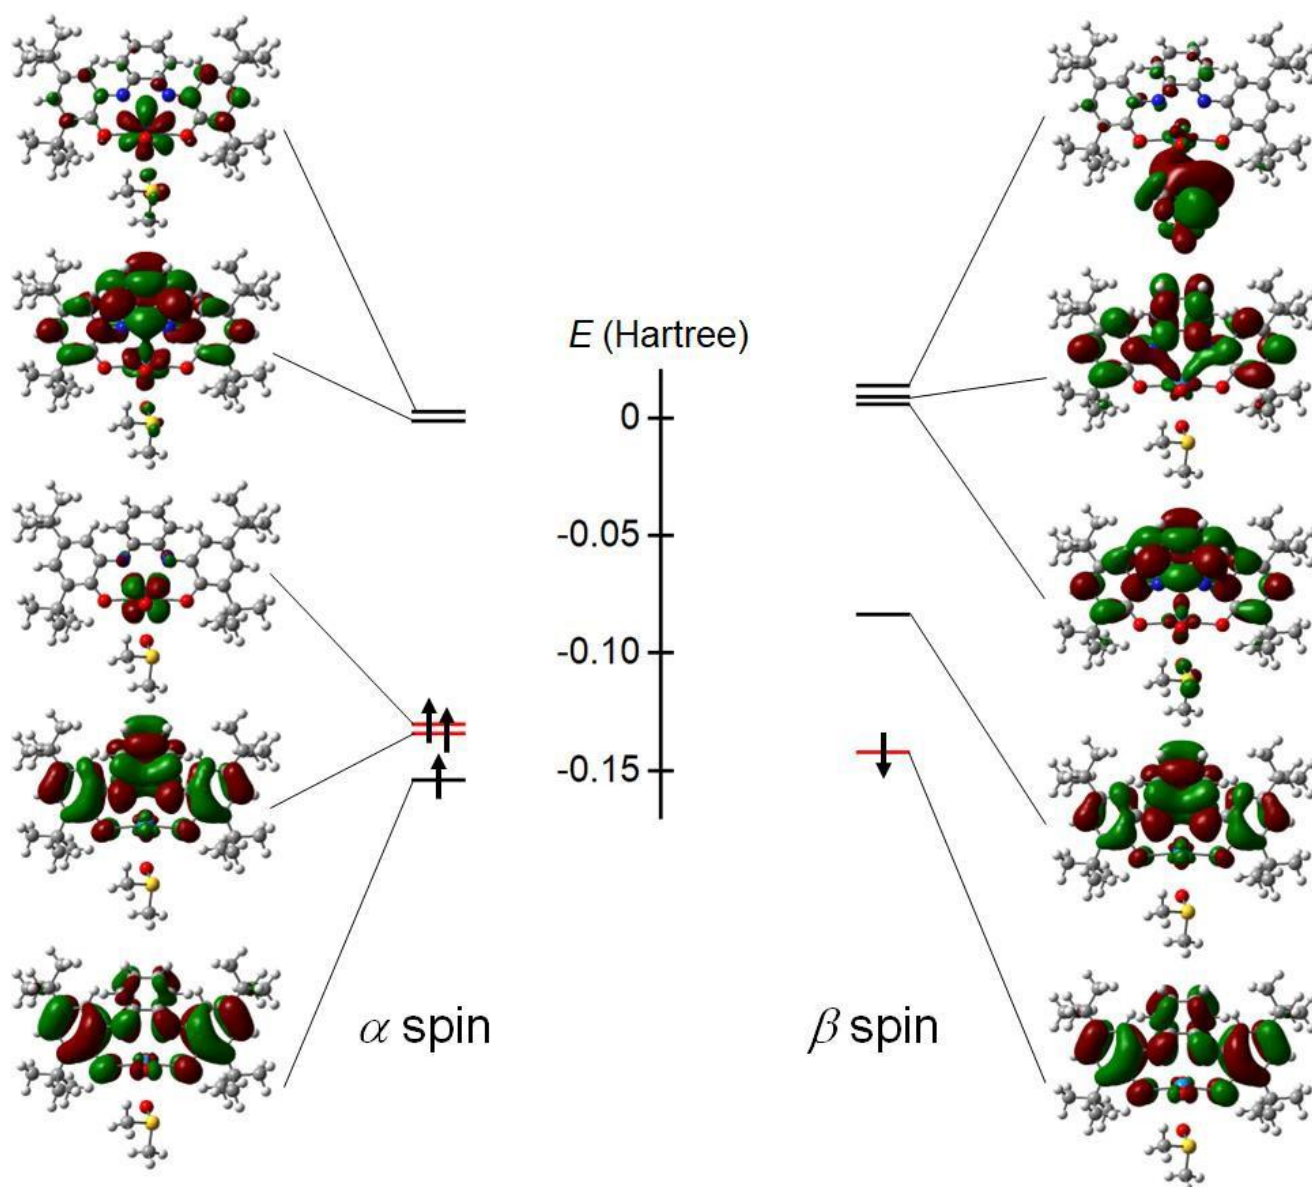

**Figure S34.** Calculated MO energy diagrams of  $[\text{UO}_2(\text{L2})\text{DMSO}]^{2-}$  ( $S_T = 1$ ).

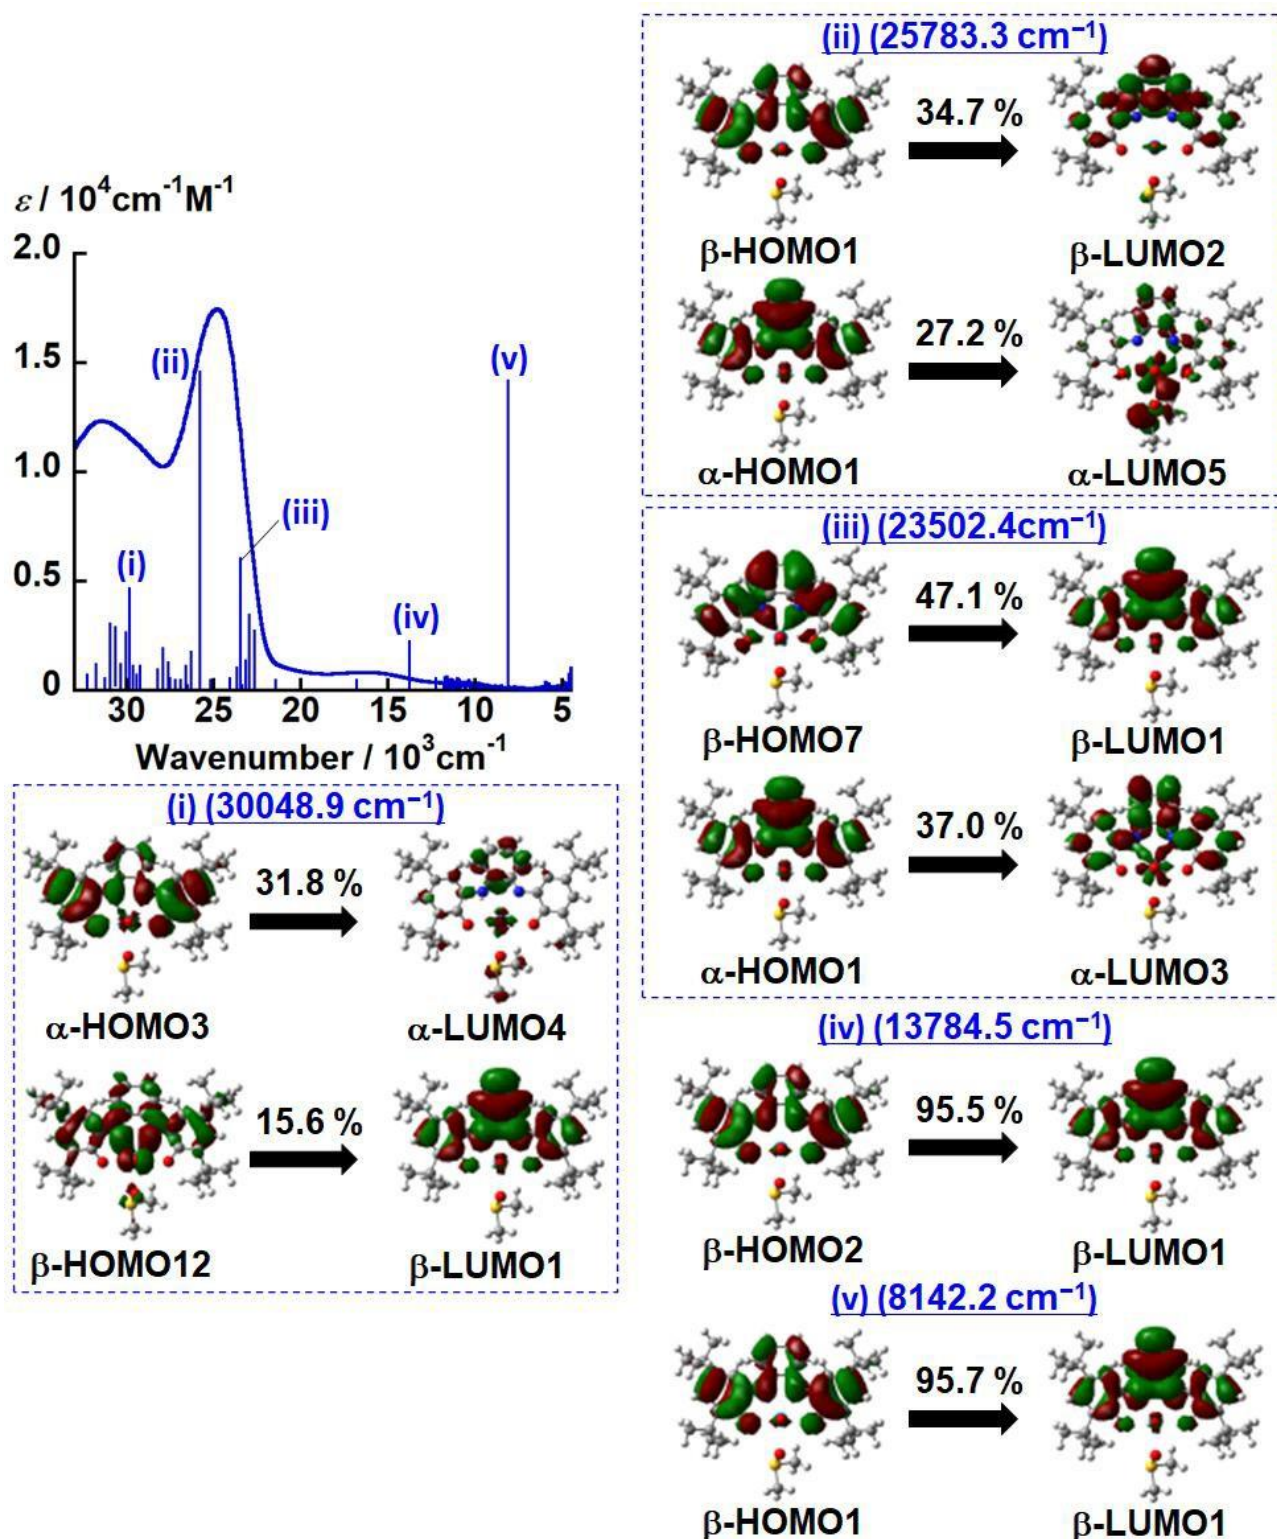

**Figure S35.** UV-vis-NIR spectrum of  $[\text{UO}_2(\text{L2})\text{DMSO}]^{2-}$  in DMSO and predicted band positions and intensities of the TD-DFT calculation. The vertical blue lines correspond to the calculated transitions for  $[\text{UO}_2(\text{L2})\text{DMSO}]^{2-}$  with  $S_T = 1$ .



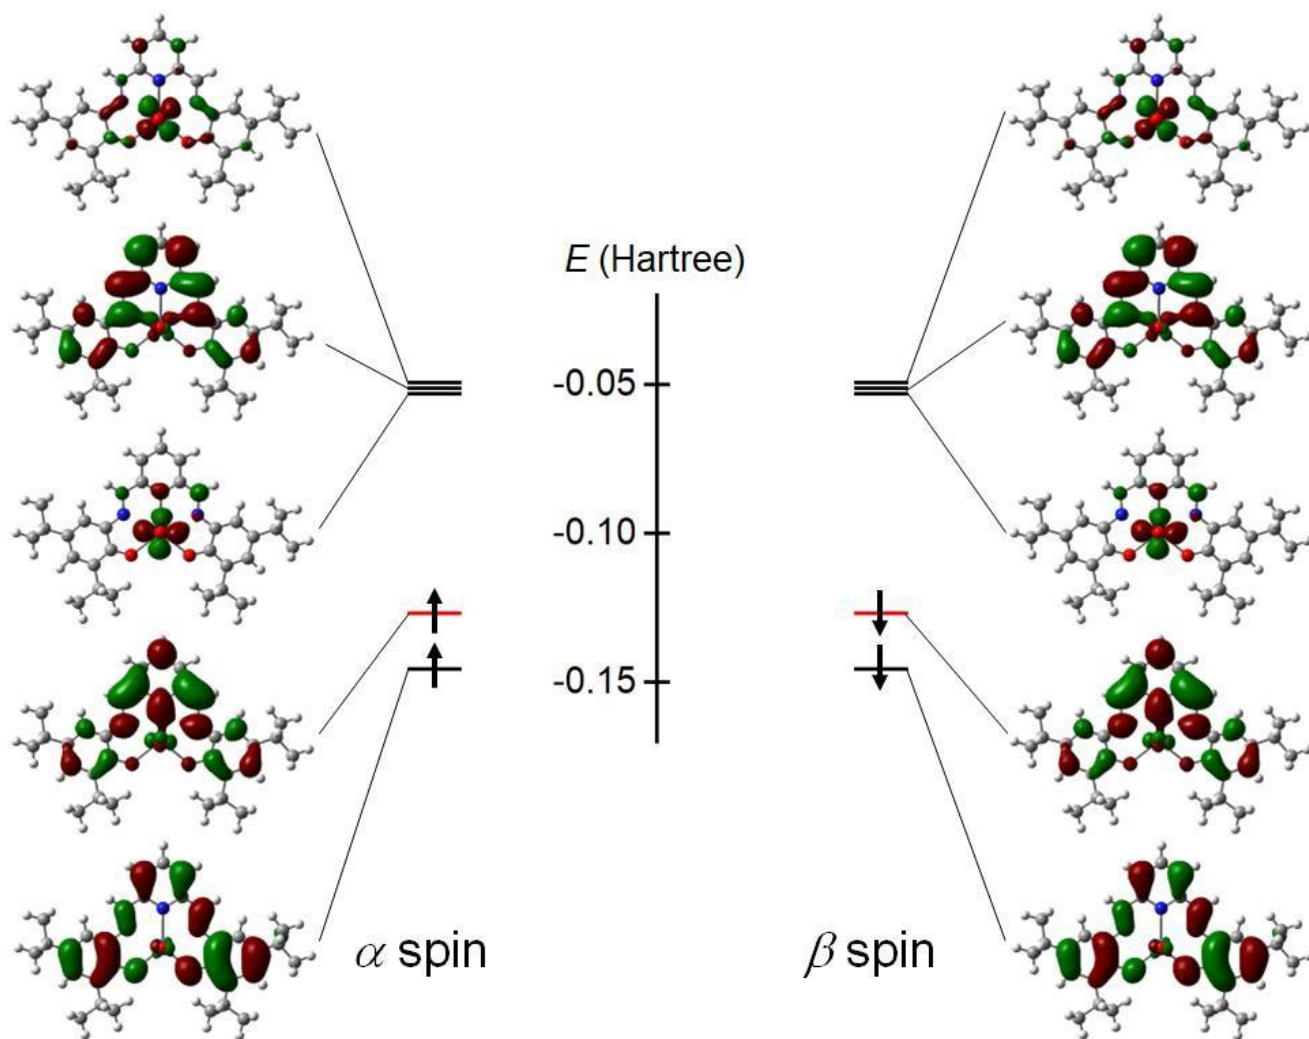

**Figure S36.** Calculated MO energy diagrams of  $[\text{UO}_2(\text{L3})]^{2-}$  ( $S_T = 0$ ).



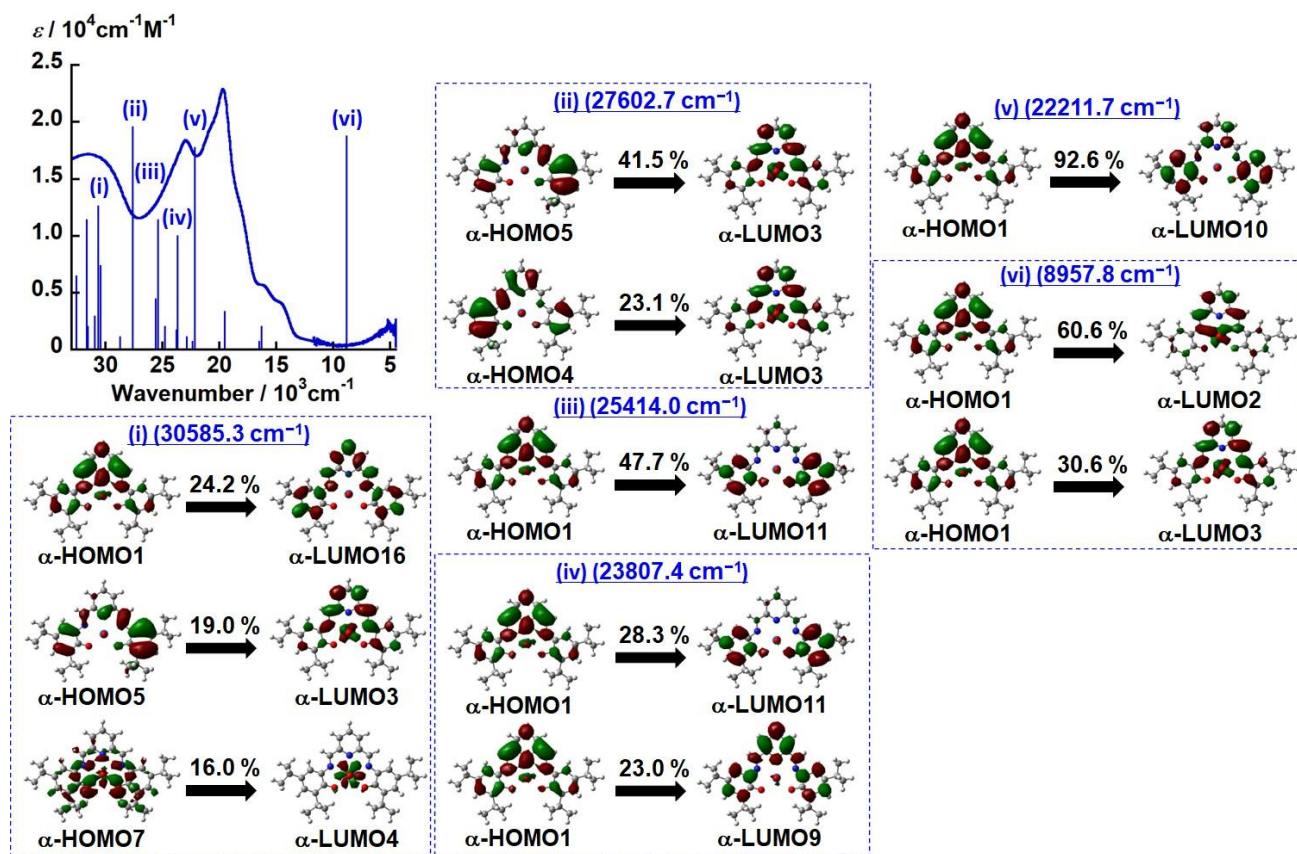

**Figure S37.** UV-vis-NIR spectrum of  $[\text{UO}_2(\text{L3})]^{2-}$  in DMSO and predicted band positions and intensities of the TD-DFT calculation. The vertical blue lines correspond to the calculated transitions for  $[\text{UO}_2(\text{L3})]^{2-}$  with  $S_T = 0$ .

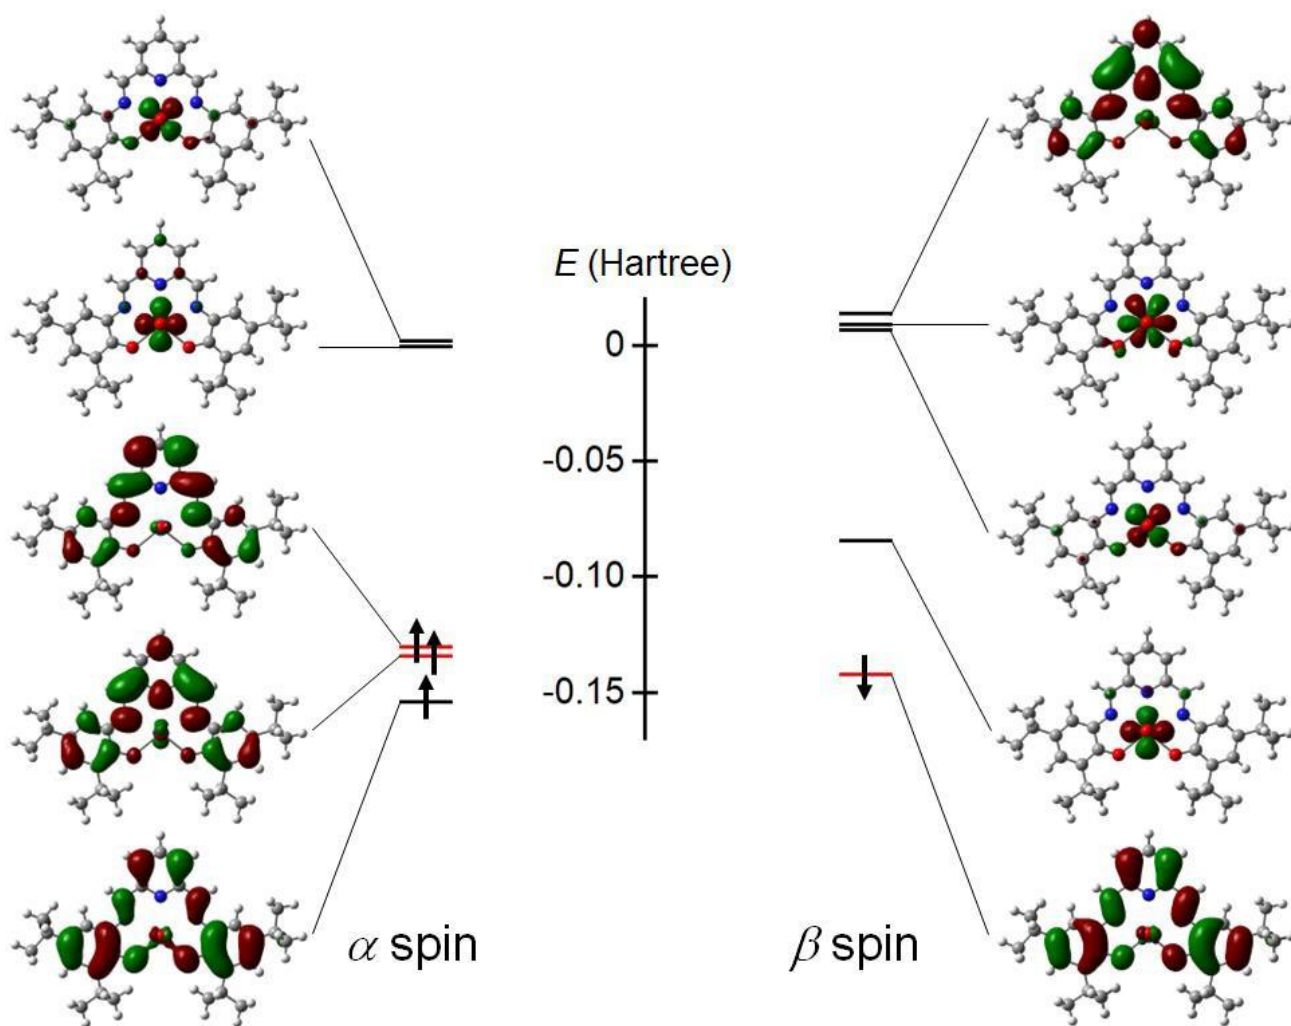

**Figure S38.** Calculated MO energy diagrams of  $[\text{UO}_2(\text{L3})]^{2-}$  ( $S_T = 1$ ).

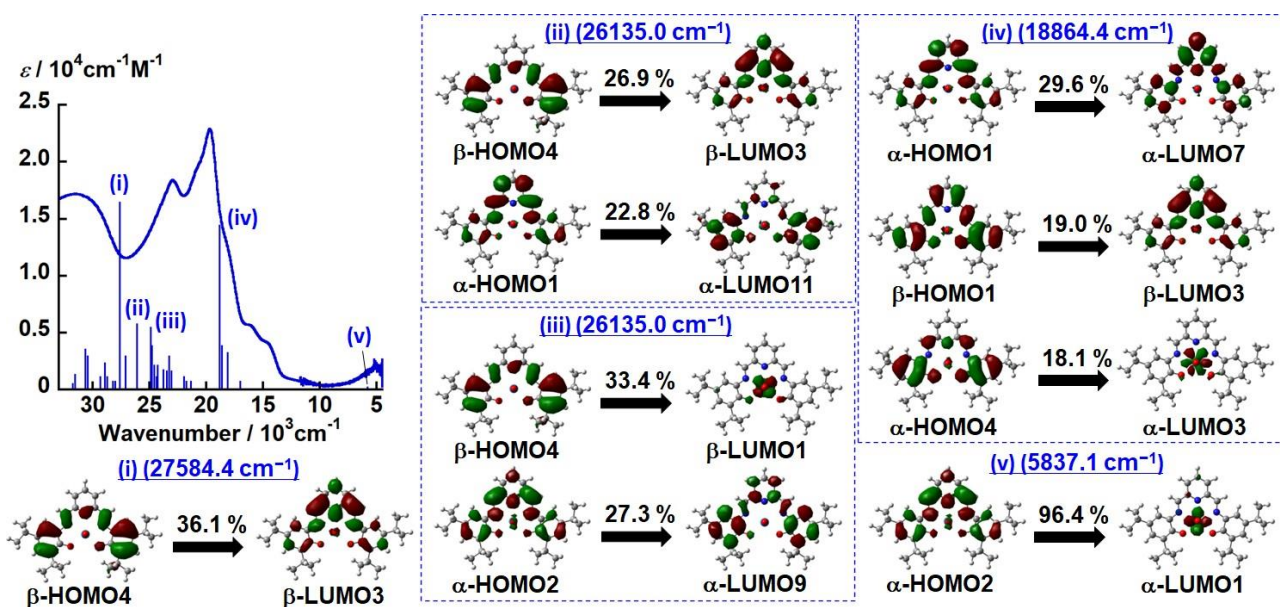

**Figure S39.** UV-vis-NIR spectrum of  $[\text{UO}_2(\text{L3})]^{2-}$  in DMSO and predicted band positions and intensities of the TD-DFT calculation. The vertical blue lines correspond to the calculated transitions for  $[\text{UO}_2(\text{L3})]^{2-}$  with  $S_T = 1$ .

Energy / Hartree

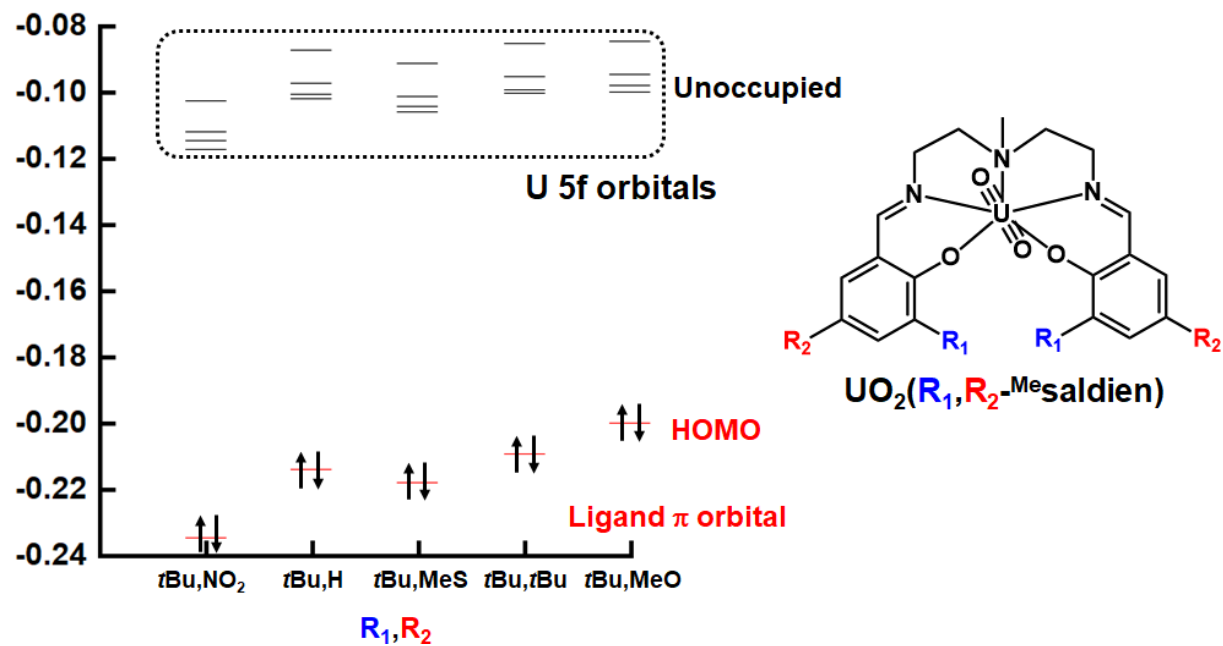

Figure S40. Calculated MO energy diagrams of  $\text{U}^{\text{VI}}\text{O}_2(\text{R}_1, \text{R}_2\text{-Me})\text{saldien}$ .<sup>S1</sup>

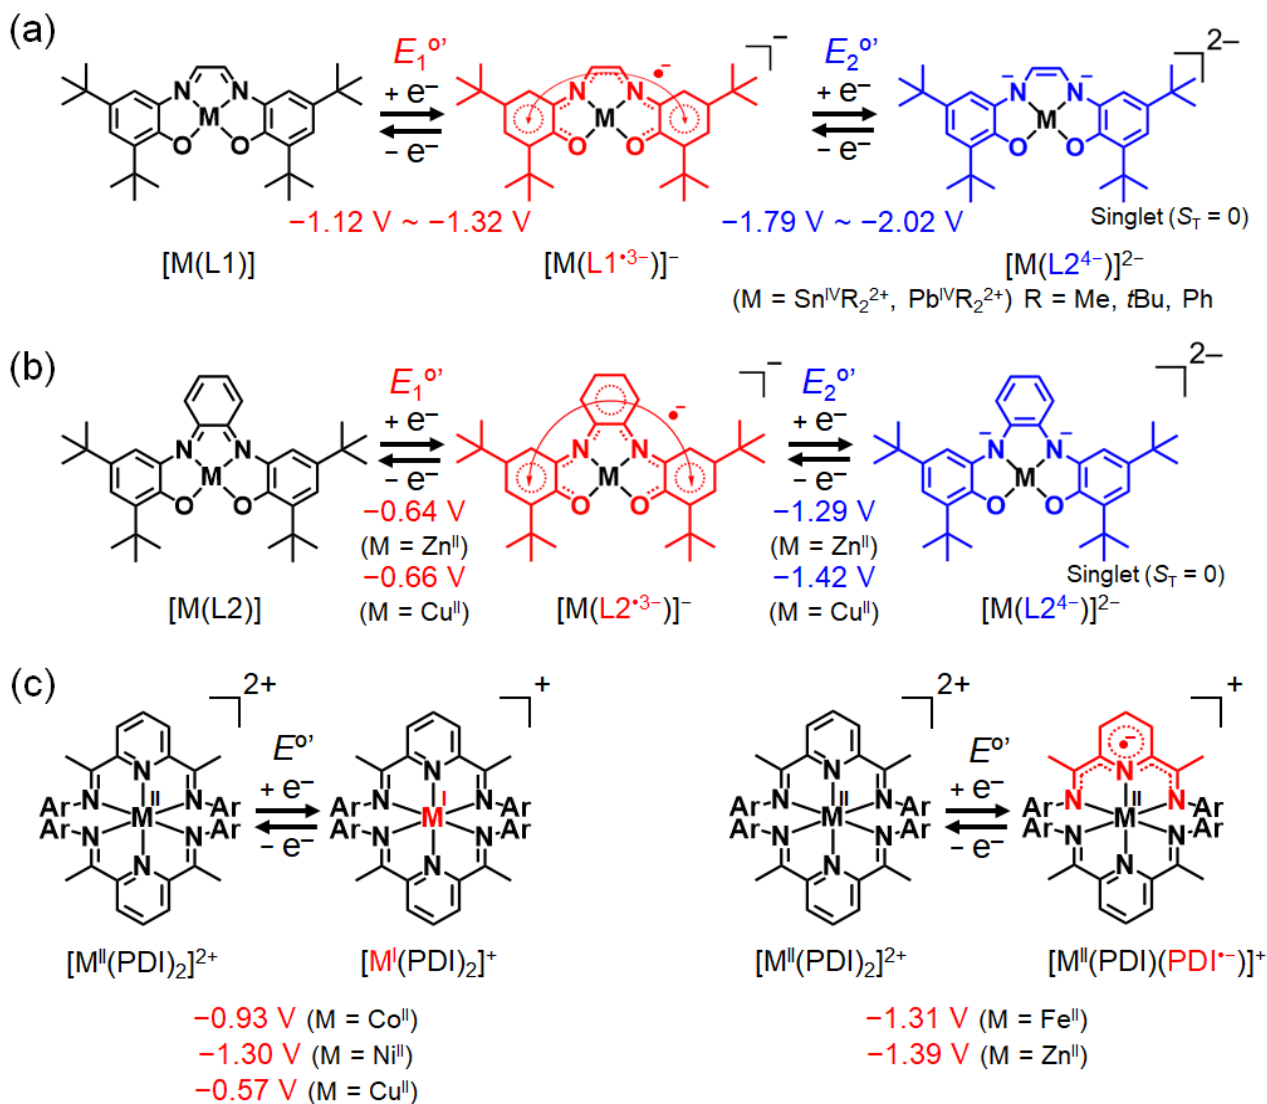

**Scheme S1.** Redox behavior  $M(L1)$ ,<sup>S2</sup>  $M(L2)$ <sup>S3</sup> and  $[M^{\text{II}}(\text{PDI})_2]^{2+}$  <sup>S4</sup> reported previously.

## References

- [S1]. T. Takeyama, S. Tsushima, K. Takao, *Inorg. Chem.*, 2021, **60**, 11435–11449.
- [S2]. A. V. Piskunov, O. Y. Trofimova, G. K. Fukin, S. Y. Ketkov, I V. Smolyaninov, V. K. Cherkasov, *Dalton Trans.*, 2012, **41**, 10970–10979.
- [S3]. P. Chaudhuri, M. Hess, J. Müller, K. Hildenbrand, E. Bill, T. Weyhermüller and K. Wieghardt, *J. Am. Chem. Soc.*, 1999, **121**, 9599–9610.
- [S4]. B. Bruin, E. Bill, E. Bothe, T. Weyhermüller, K. Wieghardt, *Inorg. Chem.*, 2000, **39**, 2936–2947.
